# Supplementary material for: Hair follicle epidermal stem cells define a niche for tactile sensation
Source: eLife. 2018 Oct 25;7:e38883. doi: 10.7554/eLife.38883 (PMC6226291; doi:10.7554/eLife.38883)
Supplement: Figure 1—source data 1. [file elife-38883-fig1-data1.xlsx]

## Sheet: Figure 1
Figure 1–source data 1: Raw numerical data for Figure 1 and associated figure supplements
	Figures 1C. Statistics source data		Figures 1D, E. Source data			The full-source data (including each replicate value) for this figure can be accessed through the BioProject ID: PRJNA342736.												Figure 1F. Statistics source data									Figure 1–S1B. RT-PCR heat-map source data							Figure 1–S1C. Statistics source data
	The source data for this figure can be accessed through the BioProject ID: PRJNA342736.		Group I (Mean FPKM)							Group II (Mean FPKM)									Grp	FPKM							Z-score (Mean)								Spon1	FPKM
			Gene_Sym	Basal	Lgr6	Gli1	CD34	Cdh3		Gene_Sym	Basal	Lgr6	Gli1	CD34	Cdh3				Basal	Lgr6+	Gli1+	CD34+	Cdh3+					Basal	Lgr6+	Gli1+	CD34+	Cdh3+			Basal	Lgr6+	Gli1+	CD34+	Cdh3+
			Cldn10	0.564834	1.3395	60.4298	0.395726	23.3429		Crispld1	0.387147	2.53432	10.2904	8.51853	2.64181			Replicate 1	0	0.018646	0.153485	0	5.07454				Lrig1	1.94237	15.112	2.63787	0.408424	0.752323		Replicate 1	0	0.018646	0.153485	0	5.07454
			Lce1a2	0.495585	5.42198	29.4289	0.291415	0		Epdr1	0.908872	7.38412	15.5623	12.8537	2.24953			Replicate 2	0.0319025	0.0495831	0.0837471	0.0137045	17.1632				Lgr6	0.0215364	0.0440818	0.132883	0.0375381	0.031216		Replicate 2	0.0319025	0.0495831	0.0837471	0.0137045	17.1632
			Grp	0.235399	0.31688	14.1262	0.206284	4.49361		Bdnf	0.46464	1.66762	7.10239	6.3194	1.34336			Replicate 3	0.0488078	0	0	0.0365993	9.63539				Gli1	0.00312047	0.108136	0.733311	0.14466	0.455936		Replicate 3	0.0488078	0	0	0.0365993	9.63539
			Ptch2	0.329514	0.620628	13.8671	0.630612	4.73513		Hoxc13	0.94222	1.95714	14.7774	11.9187	6.2362			Replicate 4					12.7347				Bdnf	0.00324658	0.0249884	0.161197	0.085895	0.0194753		Replicate 4					12.7347
			Lce1m	5.11211	21.1871	178.785	2.8878	0		Pi15	1.02015	3.97042	12.899	16.0153	2.38158			Mean	0.0269034	0.022743	0.0790774	0.0167679	11.152				CD34	0.0949464	0.0133147	0.0711022	3.2365	0.039575		Mean	0.0269034	0.022743	0.0790774	0.0167679	11.152
			Aspn	4.48928	50.2958	117.948	47.5226	21.2601		Hoxd4	0.588118	0.512426	7.56426	14.565	2.67731			SD	0.0247849	0.0250442	0.076849	0.018491	5.09494				Cdh3	0.14038	0.224529	0.375682	0.235255	3.61009		SD	0.0247849	0.0250442	0.076849	0.018491	5.09494
			Cldn4	25.9132	151.169	749.506	1.95037	175.167		Col5a2	1.14548	5.02383	14.35	19.1224	8.77621
			Wif1	1.97868	11.482	50.4161	20.9003	33.5104		Lmcd1	0.685907	3.42934	8.56398	6.10078	1.19523				Bdnf	FPKM
			Lce1c	0.934388	5.28444	20.2765	0.248773	0.604826		Hoxd8	1.59422	1.72217	14.9942	29.3692	2.63102				Basal	Lgr6+	Gli1+	CD34+	Cdh3+
			Prdm1	0.974048	5.78992	21.0618	2.59059	15.701		Nrtn	14.0139	69.158	125.389	148.609	22.4817			Replicate 1	0.436611	2.34525	7.31728	7.72631	1.09659
			Sox13	1.08776	5.12416	23.0279	6.00445	13.6489		Ogdhl	0.761988	2.25309	6.96045	7.27953	1.24073			Replicate 2	0.431512	1.55935	9.28135	6.89035	1.97653
			Lce1b	0.856041	3.34346	17.0103	0.562841	0.112584		Vwa2	12.6792	38.094	111.933	122.111	20.3409			Replicate 3	0.525798	1.09825	4.70855	4.34155	1.68929
			Asprv1	16.6007	109.657	341.893	3.77231	24.5772		Wfdc3	3.39988	9.31604	27.9065	75.3605	6.85352			Replicate 4					0.611045
			Lor	14.2656	44.4712	256.685	8.68429	0.835434		Fam101b	9.19028	35.191	69.329	88.3717	8.83707			Mean	0.46464	1.66762	7.10239	6.3194	1.34336
			Ereg	0.741885	3.90371	13.5693	0.263547	0.300206		Apbb1	1.10328	3.67515	8.47124	11.2169	3.27422			SD	0.0530254	0.630511	2.29396	1.76313	0.610397
			Pthlh	5.94191	49.964	116.704	17.1842	28.0675		Palm	1.55501	4.87944	11.2737	14.3901	4.36172
			Crct1	7.07672	28.1842	123.458	1.62332	4.15353		Pdzrn3	5.34786	19.2284	35.5047	43.6507	13.9647				Nrtn	FPKM
			Lce1a1	1.32944	6.00676	22.7681	0.554785	0		Gm973	5.53682	13.4459	36.8757	56.9033	15.2062				Basal	Lgr6+	Gli1+	CD34+	Cdh3+
			Dnase1l3	3.95074	16.7545	63.1812	0.354331	1.61622		Shisa2	7.41276	15.8391	46.6041	155.19	12.3261			Replicate 1	16.1429	89.89	94.0723	162.913	33.1435
			Trex2	2.4416	15.3516	35.0646	0.881682	1.18472		Lhx2	19.8148	54.8603	122.531	362.807	57.7534			Replicate 2	16.2643	59.9869	174.203	165.232	25.4177
			Kprp	1.22571	2.55916	16.4825	0.469428	0.211307		Ncald	0.804947	0.981871	4.57594	13.2311	1.58404			Replicate 3	9.63447	57.5971	107.892	117.681	15.2745
			Flg2	1.76492	4.43103	20.2249	0.883075	0.00764083		Ltbp1	2.92104	5.31814	17.0454	18.9079	8.56728			Replicate 4					16.0912
			Tgfb2	2.3327	10.8675	27.6755	4.03107	4.41019		Chat	2.85584	5.92857	16.2538	60.2099	2.67302			Mean	14.0139	69.158	125.389	148.609	22.4817
			Fcho1	0.718847	2.9191	8.44919	1.65571	1.81284		Dab2	1.03344	2.25552	5.2646	17.6883	0.972857			SD	3.79317	17.9942	42.8351	26.8092	8.46712
			Gjb2	0.942043	4.32925	9.98879	0.223868	5.96582		Postn	133.616	230.712	553.621	1696.77	142.851
			2310050C09Rik	5.90447	16.6643	61.1096	1.78411	1.41249		A030009H04Rik	2.61026	2.72508	10.4521	10.263	2.78348				Aspn	FPKM
			Kctd11	4.21666	25.1814	42.8643	2.05685	26.0323		Pltp	3.93039	6.86203	16.0111	13.8335	9.72499				Basal	Lgr6+	Gli1+	CD34+	Cdh3+
			Tgfb3	2.84389	11.2057	27.4969	9.13804	8.8319		Slc35g1	2.68654	2.98091	10.205	9.35071	6.06402			Replicate 1	5.65245	64.2935	108.546	59.1724	19.7587
			Sp6	1.00064	4.99774	9.67659	0.261973	0.951477		Spon2	2.29242	4.43259	8.9459	23.1981	1.47075			Replicate 2	5.66483	54.6065	164.259	56.2049	30.3128
			Krt23	3.70146	7.26123	33.474	0.675634	8.67924		Hoxc8	4.41189	9.60909	17.02	24.1531	10.9467			Replicate 3	2.15057	31.9873	81.0394	27.1906	16.1055
			Tspan8	5.6647	15.8938	45.8281	4.77403	14.5401		Fxyd6	11.0181	16.2683	41.6424	44.6996	13.2223			Replicate 4					18.8636
			Ugcg	6.90641	20.2349	55.9486	3.32024	11.9191		Hoxb9	3.43412	5.18192	12.0066	20.4995	5.56441			Mean	4.48928	50.2958	117.948	47.5226	21.2601
			Hal	5.08813	15.7346	39.405	1.23694	0.3881		Gas1	39.5905	57.2323	135.266	219.17	56.9935			SD	2.02539	16.5789	42.399	17.6705	6.23214
			Mboat2	3.20076	8.48769	23.9391	4.22686	5.1349		Egfl6	7.63841	8.65599	25.0121	40.6698	6.05308
			Kctd12 Mir5130	12.9345	34.8837	93.5012	3.10806	16.8914		Map6	4.55854	8.54326	15.5037	41.7639	8.33824				Crispld1	FPKM
			Serpinb12	5.37385	19.8564	39.4368	0.733265	0.635474		Fam83d	9.90348	17.1644	30.6356	34.5582	10.7184				Basal	Lgr6+	Gli1+	CD34+	Cdh3+
			Cdsn	6.62074	23.7285	47.5496	3.43285	8.03946		Tgm5	24.3777	24.0687	76.4212	456.902	46.6996			Replicate 1	0.51364	3.56708	10.6577	10.1611	1.62538
			Hba-a1 Hba-a2	2.17539	4.98328	14.6228	0.306175	0.478133		Igfbp5	1.73248	0.217923	5.62628	45.9045	1.0699			Replicate 2	0.294749	2.54666	14.221	8.24153	5.30362
			Dkkl1	6.54862	18.427	45.3196	1.62253	0.763408		Col8a2	4.86539	6.21776	14.3471	110.937	5.65276			Replicate 3	0.353053	1.48923	5.99264	7.15297	2.59822
			Skint10	9.57002	24.3632	59.3417	0.916039	1.85111		Scx	6.3452	8.75233	17.7518	89.269	9.53036			Replicate 4					1.04001
			Prkar2b	1.10278	0.835705	6.63692	2.90194	4.61817		Lrp12	6.14029	8.86505	15.336	19.9032	10.807			Mean	0.387147	2.53432	10.2904	8.51853	2.64181
			Tubb2b	2.79577	9.74378	16.9066	1.62547	5.96957		Igfbp7	30.3249	20.2394	73.9622	155.992	20.4138			SD	0.113358	1.03898	4.12646	1.52308	1.88733
			Srxn1	4.26614	9.95158	24.8338	3.6532	11.0333		Cadm1	9.69052	11.6787	21.8594	46.4205	14.5192
			2310002J15Rik	7.46356	19.6427	44.0544	5.4033	5.42018		Olfm1	5.97956	3.74407	14.9392	11.284	10.8469				Egfl6	FPKM
			1100001G20Rik	5.64976	7.47332	30.7122	0.130827	0		Maged2	5.96894	6.15823	12.7214	16.9547	8.59857				Basal	Lgr6+	Gli1+	CD34+	Cdh3+
			Pcdh1	14.0124	40.9891	75.7012	8.40003	17.1095		Gpr125	47.9497	45.4347	100.615	119.038	76.7036			Replicate 1	6.69168	12.6657	31.1083	56.3981	8.57492
			Rab11fip1	2.38325	3.94868	11.8007	1.32879	2.9226		Mvb12b	3.23774	2.44934	6.83667	13.1101	3.39486			Replicate 2	9.12347	8.6379	43.6749	49.583	9.84258
			Lipg	8.83768	20.315	44.8751	1.81425	11.1444		Enpp5	3.90876	1.46333	7.42763	15.5334	3.1507			Replicate 3	9.76005	10.3573	26.6325	46.7002	4.76018
			Tmem35	2.41332	3.20659	12.3311	0.72922	5.56088		Adamtsl4	8.44995	7.96905	16.2176	118.302	6.75443			Replicate 4					4.75545
			Synpo	3.35543	5.77586	16.6214	11.1636	7.0832		Bmi1	9.60172	8.41875	16.1078	15.9828	10.256			Mean	8.52507	10.5536	33.8052	50.8938	6.98328
			Areg	18.4314	52.7091	89.028	1.16552	46.1456		Arsa	6.59187	7.07961	12.1409	13.0245	5.644			SD	1.61935	2.02106	8.83549	4.98005	2.62134
			Tubb2a	21.0466	52.3911	101.807	36.6821	46.2883		Ift57	3.24195	2.69984	5.40327	18.9908	3.50204
			Krt78	14.1237	37.5999	63.7885	1.73343	0.643213		Rorc	6.01056	4.4848	9.71216	15.6196	5.68098				Col4a3	FPKM
			Asah2	2.81575	5.04782	12.0915	2.53132	1.91331		Arhgef10	9.26053	7.79295	14.8814	20.145	8.22883				Basal	Lgr6+	Gli1+	CD34+	Cdh3+
			Spink5	18.4122	31.6598	75.4926	4.22323	6.4553		Itm2c	32.4133	29.1139	52.3746	76.8019	35.6503			Replicate 1	0.214112	1.74591	7.64311	2.19113	0.793618
			Ptch1	6.41862	6.7195	27.5362	10.6759	15.7529		Pdgfa	30.2854	25.8282	46.6515	75.1124	30.0829			Replicate 2	0.203798	2.11682	8.80649	1.79789	0.935693
			Ddit3	26.085	23.6161	109.355	26.614	66.4027		Leprel4	14.1015	11.1051	19.6865	54.3382	7.93775			Replicate 3	0.288908	0.970267	2.94949	1.37014	0.544631
			Gm94	111.555	185.027	440.172	9.8982	7.55105										Replicate 4					0.508184
			Cyp2b19	2.50304	3.92905	9.29351	0.476984	1.71334										Mean	0.235606	1.611	6.46636	1.78639	0.695531
			Galm	2.83095	1.57004	9.8278	1.84154	5.23994										SD	0.0464481	0.585061	3.10075	0.410616	0.204262
			Cgn	2.92831	6.32738	9.75792	1.21488	4.8784
			Fam110a	22.1731	21.5164	68.1448	10.0006	22.6522											Col4a4	FPKM
			Cpe	45.9581	63.535	126.745	70.2372	88.4296											Basal	Lgr6+	Gli1+	CD34+	Cdh3+
			Tnik	3.72932	6.05412	10.6469	1.67985	2.24892										Replicate 1	0.279616	3.00879	6.45227	3.10459	0.65721
			Cd82	42.1622	63.817	119.044	36.299	24.3364										Replicate 2	0.232233	2.24206	8.88084	2.78973	0.940317
			Vgll3	3.45248	4.641	9.43163	0.780569	3.01043										Replicate 3	0.322399	1.47619	5.49668	1.69051	0.805281
			Cln8	2.92855	4.38916	7.73497	2.40414	3.28136										Replicate 4					0.591424
			Mir5114 Scd2	11.5287	13.6033	29.7514	13.0458	9.43228										Mean	0.278083	2.24235	6.94326	2.52828	0.748558
			Syngr1	4.41864	5.28665	9.05085	2.91168	4.24121										SD	0.0451026	0.7663	1.74469	0.742411	0.156018
			Mbd6	23.1874	23.8675	57.6444	27.9343	20.6208
			Pdgfb	11.7809	12.1705	26.3597	15.7475	14.9161
			Tob2	37.0263	41.0615	77.8576	34.0747	57.1585
			Wnt7b	24.9151	27.3215	52.0363	16.7333	5.2785
			Mars	18.7385	20.4317	37.5122	13.7827	11.7849
			Plekha5	8.46063	9.1928	15.7625	6.70123	8.07436
			Plscr4	7.60249	3.39553	13.1033	4.67938	7.53385
			Spry1	28.1156	27.854	49.593	16.0907	21.1338
			Dctn2	77.6905	88.8358	134.633	69.2579	32.1928
			Ccnd1 Mir3962	21.7453	22.144	36.5714	19.5182	22.6944
			Sorbs1	6.06663	4.54233	10.0441	2.38696	3.41281
