# Supplementary material for: Hair follicle epidermal stem cells define a niche for tactile sensation
Source: eLife. 2018 Oct 25;7:e38883. doi: 10.7554/eLife.38883 (PMC6226291; doi:10.7554/eLife.38883)
Supplement: Figure 2—source data 1. [file elife-38883-fig2-data1.xlsx]

## Sheet: Figure 2
Figure 2–source data 1: Raw numerical data for Figure 2
	Figure 2G. Statistics source data
		Egfl6-GFP+ve cells in K14+ve cells	Total K14+ve cells counted	%	Egfl6-GFP+ve cells in nestin+ve cells	Total nestin+ve cells counted	%	Egfl6-GFP+ve dermal cells around upper-bulge	Total dermal cells around upper-bulge counted	%			Egfl6-GFP+ve DRG cells	Total DRG cells counted (bIII-tubulin +ve)	%
	Mouse 1: follicle1	12	33	36.3636	0	4	0	0	8	0		Mouse 1: DRG1	0	104	0
	Mouse 1: follicle2	19	41	46.3415	0	5	0	0	13	0		Mouse 1: DRG2	1	188	0.531915
	Mouse 1: follicle3	6	32	18.75	0	5	0	0	14	0		Mouse 1: DRG3	0	80	0
	Mouse 1: follicle4	11	43	25.5814	0	4	0	0	12	0		Mouse 1: DRG4	0	48	0
	Mouse 1: follicle5	6	41	14.6341	0	5	0	0	16	0		Mouse 1: DRG5	0	41	0
	Mouse 1: follicle6	10	45	22.2222	0	5	0	0	15	0		Mouse 1: DRG6	0	51	0
	Mouse 1: follicle7	16	54	29.6296	0	6	0	0	16	0		Mouse 1: DRG7	0	141	0
	Mouse 2: follicle1	9	56	16.0714	0	2	0	0	16	0		Mouse 1: DRG8	0	58	0
	Mouse 2: follicle2	5	53	9.43396	0	4	0	0	19	0		Mouse 2: DRG1	0	202	0
	Mouse 2: follicle3	16	43	37.2093	0	3	0	0	18	0		Mouse 2: DRG2	0	87	0
	Mouse 2: follicle4	8	45	17.7778	0	4	0	0	15	0		Mouse 2: DRG3	0	186	0
	Mouse 2: follicle5	12	43	27.907	0	4	0	0	16	0		Mouse 2: DRG4	1	44	2.27273
	Mouse 2: follicle6	14	45	31.1111	0	4	0	0	17	0		Mouse 2: DRG5	0	56	0
	Mouse 2: follicle7	21	51	41.1765	0	5	0	0	11	0		Mouse 2: DRG6	0	52	0
	Mouse 3: follicle1	15	54	27.7778	0	5	0	0	10	0		Mouse 2: DRG7	0	125	0
	Mouse 3: follicle2	8	46	17.3913	0	4	0	0	17	0		Mouse 2: DRG8	0	82	0
	Mouse 3: follicle3	16	53	30.1887	0	4	0	0	19	0		Mouse 3: DRG1	0	79	0
	Mouse 3: follicle4	15	45	33.3333	0	5	0	0	22	0		Mouse 3: DRG2	0	31	0
	Mouse 3: follicle5	11	73	15.0685	0	5	0	0	15	0		Mouse 3: DRG3	0	69	0
	Mouse 3: follicle6	22	62	35.4839	0	4	0	0	15	0		Mouse 3: DRG4	0	71	0
	Mouse 3: follicle7	17	52	32.6923	0	4	0	0	15	0		Mouse 3: DRG5	0	104	0
	Total (n = 21 follicles)	269	1010		0	91		0	319			Mouse 3: DRG6	0	68	0
	Mean			26.9593			0			0		Mouse 3: DRG7	0	44	0
	SD			9.84985			0			0		Mouse 3: DRG8	0	26	0
												Mouse 3: DRG9	0	101	0
												Total (n = 25 DRGs)	1	1718
												Mean			0.108225
												SD			0.49595
