# Supplementary material for: Hair follicle epidermal stem cells define a niche for tactile sensation
Source: eLife. 2018 Oct 25;7:e38883. doi: 10.7554/eLife.38883 (PMC6226291; doi:10.7554/eLife.38883)
Supplement: Figure 3—source data 1. [file elife-38883-fig3-data1.xlsx]

## Sheet: Figure 3
Figure 3–source data 1: Raw numerical data for Figure 3
	Figure 3B. Statistics source data													Figure 3C. Statistics source data					Figure 3E. Statistics source data												Figure 3G. Statistics source data
	Keratinocytes													T98G					T98G												Integrin av signal intensity (A.U.)
	Absorbance @ 600 (1.0s) (A)													Coated ECM	Celll adhesion (%)				EGFL6 coating												Hair follicle ID	WT		Hair follicle ID	Egfl6 KO
	ECM conc (nM)	80	40	20	10	5	2.5	1.25	0.625	0				EGFL6	1.00156	Replicate 1				Celll adhesion (%)											Mouse1: follicle1	1.84		Mouse1: follicle1	0.69
	Coated ECM													EGFL6	0.936037	Replicate 2				No Ab	IgG	a2	a3	a5	a6	av	b1	av+b1			Mouse1: follicle2	2.1		Mouse1: follicle2	0.8
	EGFL6	0.017	0.003	0.002	-0.005	0.005	0.022	0.01	0.004	0.033	Replicate 1			EGFL6	1.0624	Replicate 3			Replicate 1	0.822203	0.941891	0.772767	0.85863	1.16045	1.14224	0.21856	1.16826	0.247181			Mouse1: follicle3	1.71		Mouse1: follicle3	0.95
	EGFL6	0.029	0.017	0	0.002	0.033	0.008	-0.008	0.005	0	Replicate 2			Mean	1				Replicate 2	0.757155	1.01214	0.9549	1.15525	1.14224	1.48049	0.140503	1.27493	0.179532			Mouse1: follicle4	1.29		Mouse1: follicle4	0.43
	EGFL6	0.068	0.008	0.036	0.001	0.013	-0.008	0.011	-0.003	0.03	Replicate 3			SEM	0.0364867				Replicate 3	0.863834	1.04597	0.90026	1.26973	1.25672	1.26192	0.182134	1.31396	0.296617			Mouse2: follicle1	4.24		Mouse1: follicle5	1.18
	NPNT	0.055	0.065	0.041	0.03	0.033	0.021	0.026	0.029	0.021	Replicate 1								Mean	0.814397	1	0.875976	1.09454	1.18647	1.29488	0.180399	1.25239	0.24111			Mouse2: follicle2	0.94		Mouse1: follicle6	0.76
	NPNT	0.048	0.052	0.032	0.019	0.022	0.009	0.022	0.011	0.023	Replicate 2			Coated ECM	Celll adhesion (%)				SEM	0.0310417	0.0306515	0.0539613	0.122496	0.0355171	0.0990246	0.0225499	0.0435469	0.0339358			Mouse2: follicle3	1.34		Mouse1: follicle7	1.8
	NPNT	0.039	0.034	0.014	0.015	0.01	0.006	0.006	0.006	0	Replicate 3			EGFL6 (RGE)	0.0795632	Replicate 1															Mouse2: follicle4	2.35		Mouse2: follicle1	0.74
														EGFL6 (RGE)	0.0187208	Replicate 2			NPNT coating												Mouse2: follicle5	0.48		Mouse2: follicle2	0.32
														EGFL6 (RGE)	0.0655226	Replicate 3				Celll adhesion (%)											Mouse2: follicle6	1.95		Mouse2: follicle3	1.06
														Mean	0.0546022					No Ab	IgG	a2	a3	a5	a6	av	b1	av+b1			Mouse3: follicle1	6.07		Mouse2: follicle4	0.85
	ECM conc (nM)	80	40	20	10	5	2.5	1.25	0.625	0				SEM	0.0183929				Replicate 1	0.696266	1.06559	1.01413	1.16549	1.05227	1.10071	1.12492	0.445005	0.257316			Mouse3: follicle2	2.38		Mouse2: follicle5	1.86
	Coated ECM																		Replicate 2	1.1552	1.01836	1.02926	1.1552	1.01171	1.16912	1.0553	0.353582	0.266398			Mouse3: follicle3	1.52		Mouse3: follicle1	0.57
	EGFL6	0.559	0.611	0.659	0.555	0.473	0.326	0.17	0.063	0	Replicate 1			KG-1-C					Replicate 3	0.667205	0.916044	0.758628	1.09949	0.928759	0.99112	0.888194	0.331786	0.263976			Mean	2.17		Mouse3: follicle2	0.58
	EGFL6	0.569	0.648	0.661	0.546	0.491	0.345	0.175	0.059	0.011	Replicate 2			Coated ECM	Celll adhesion (%)				Mean	0.839556	1	0.934006	1.14006	0.997578	1.08698	1.02281	0.376791	0.262563			SD	1.47761		Mouse3: follicle3	0.85
	EGFL6	0.62	0.672	0.686	0.545	0.449	0.298	0.143	0.061	0.021	Replicate 3			EGFL6	1.01411	Replicate 1			SEM	0.158043	0.0441359	0.0877979	0.0204991	0.0363476	0.0518408	0.0702428	0.0346825	0.00271518						Mouse3: follicle4	0.42
	NPNT	0.736	0.865	0.87	0.843	0.779	0.71	0.645	0.551	0.015	Replicate 1			EGFL6	0.943563	Replicate 2																		Mean	0.86625
	NPNT	0.722	0.944	0.884	0.933	0.68	0.643	0.551	0.547	0.005	Replicate 2			EGFL6	1.04233	Replicate 3																		SD	0.44145
	NPNT	0.859	0.929	0.908	0.879	0.809	0.675	0.635	0.432	0	Replicate 3			Mean	1				KG-1-C
														SEM	0.0293709				EGFL6 coating
																				Celll adhesion (%)
														Coated ECM	Celll adhesion (%)					No Ab	IgG	a2	a3	a5	a6	av	b1	av+b1
														EGFL6 (RGE)	0.271605	Replicate 1			Replicate 1	0.828039	1.01166	0.890119	2.02856	1.14631	1.10522	0.24745	1.99883	0.248324
	HEC293													EGFL6 (RGE)	0.268078	Replicate 2			Replicate 2	0.85427	0.992422	0.954824	1.95949	1.18129	1.1297	0.243078	1.73652	0.216846
	ECM conc (nM)	80	40	20	10	5	2.5	1.25	0.625	0				EGFL6 (RGE)	0.301587	Replicate 3			Replicate 3	0.837657	0.99592	0.917225	1.81784	1.18041	1.19878	0.221218	1.81696	0.214223
	Coated ECM													Mean	0.280423				Mean	0.839988	1	0.920723	1.9353	1.16934	1.14456	0.237249	1.85077	0.226465
	EGFL6	0.0245374	0.00966191	0.00321761	0.0123184	0.00776639	-0.00260845	-0.00683028	0.0122741	0.0138411	Replicate 1			SEM	0.0106309				SEM	0.00766157	0.00591586	0.0187602	0.0620222	0.0115154	0.0280121	0.0081139	0.0775875	0.0109559
	EGFL6	0.0501167	0.0153865	0.00389487	0.0129552	0.000952559	-0.0121671	-0.00205916	0.00567829	0	Replicate 2
	EGFL6	0.0293888	0.0135433	-0.00320841	0.0129732	0.00580749	-0.00740725	-0.00787399	-0.00113654	0.00480077	Replicate 3								NPNT coating
	NPNT	0.668255	0.763887	0.759634	0.847493	0.678969	0.609264	0.45656	0.190657	0.00230545	Replicate 1									Celll adhesion (%)
	NPNT	0.661145	0.793612	0.752904	0.790853	0.679585	0.593816	0.392622	0.101953	0	Replicate 2									No Ab	IgG	a2	a3	a5	a6	av	b1	av+b1
	NPNT	0.681955	0.759643	0.762553	0.809047	0.645352	0.526866	0.339567	0.0777829	0.015934	Replicate 3								Replicate 1	1.05523	1.0562	1.04554	1.98353	1.05136	1.59593	0.395349	1.5407	0.234496
																			Replicate 2	0.840116	1.02035	0.908915	1.9186	1.31105	1.10174	0.55814	1.58915	0.32655
																			Replicate 3	0.919574	0.92345	1.07558	1.7374	1.03682	1.26744	0.507752	1.51066	0.167636
																			Mean	0.938308	1	1.01001	1.87985	1.13308	1.32171	0.48708	1.54683	0.242894
	ECM conc (nM)	80	40	20	10	5	2.5	1.25	0.625	0									SEM	0.0628013	0.0396499	0.0512874	0.0736456	0.0890844	0.145216	0.0481169	0.0228644	0.0460665
	Coated ECM
	EGFL6	1.05532	1.00833	1.02863	1.01406	0.923616	0.934161	0.637731	0.182766	0.0262964	Replicate 1
	EGFL6	1.03634	1.0136	1.00868	1.08111	0.965095	0.867855	0.669598	0.157606	0.00387109	Replicate 2
	EGFL6	1.05716	0.99822	0.918717	0.968733	0.916881	0.842953	0.60342	0.103334	0	Replicate 3
	NPNT	1.00191	1.02957	1.02729	1.02204	1.06962	1.00208	1.07949	1.05243	0.00874244	Replicate 1
	NPNT	1.01656	1.02183	0.999388	1.0186	1.01872	1.05112	1.0597	1.07024	0	Replicate 2
	NPNT	1.08713	1.0778	1.05452	1.14593	1.00987	1.08974	1.05416	1.03525	0.00936027	Replicate 3
	T98G
	ECM conc (nM)	80	40	20	10	5	2.5	1.25	0.625	0
	Coated ECM
	EGFL6	0.416776	0.254805	0.0895482	0.0212272	0.013872	0.00728194	0.00439835	0.00107807	0.00996928	Replicate 1
	EGFL6	0.385296	0.253659	0.106707	0.0232867	0.00903753	-0.00286231	-0.000807698	-0.00671187	0.00905079	Replicate 2
	EGFL6	0.42947	0.253014	0.094794	0.025743	0.00338252	-0.00460265	-0.0105607	-0.0123378	0	Replicate 3
	NPNT	0.904457	0.956053	1.02507	0.921992	0.924431	0.871789	0.79812	0.486407	0.0127688	Replicate 1
	NPNT	0.892794	0.943295	0.973796	0.970325	0.943598	0.867143	0.742804	0.502631	0.00139827	Replicate 2
	NPNT	0.908415	0.959353	0.967888	1.01642	0.849176	0.833365	0.680878	0.456312	0	Replicate 3
	ECM conc (nM)	80	40	20	10	5	2.5	1.25	0.625	0
	Coated ECM
	FN	0.952516	0.908023	0.893949	0.841732	0.81226	0.72499	0.375425	0.0515011	0.00324736	Replicate 1
	FN	0.835932	0.930454	0.926069	0.875745	0.832946	0.732116	0.365743	0.0294994	0	Replicate 2
	FN	0.920881	0.8888	0.913395	0.896773	0.784067	0.775929	0.389863	0.0465737	0.000633109	Replicate 3
	LN511-E8	0.861146	0.921784	0.941148	0.919488	0.877492	0.873419	0.887929	0.927611	0.00983809	Replicate 1
	LN511-E8	0.870675	0.918467	0.961501	0.880581	0.812989	0.955985	0.974219	0.999972	0	Replicate 2
	LN511-E8	0.961554	0.925484	0.97074	0.982379	0.843146	0.915275	0.956147	0.980008	0.00601016	Replicate 3
	KG-1-C
	ECM conc (nM)	80	40	20	10	5	2.5	1.25	0.625	0
	Coated ECM
	EGFL6	0.521282	0.489289	0.400873	0.270248	0.281186	0.113918	0.0291046	-0.0209559	0.0133647	Replicate 1
	EGFL6	0.564068	0.509569	0.487568	0.286016	0.288182	0.160207	0.0629859	0.00669664	0	Replicate 2
	EGFL6	0.528103	0.505467	0.465709	0.245332	0.225816	0.117091	0.0471799	-0.0312665	0.0169293	Replicate 3
	NPNT	0.6411	0.636857	0.699796	0.497968	0.533442	0.634089	0.481283	0.362432	0.0506027	Replicate 1
	NPNT	0.621863	0.606738	0.652992	0.58077	0.564649	0.656177	0.512772	0.280614	0.049082	Replicate 2
	NPNT	0.600276	0.632254	0.712692	0.527533	0.508333	0.686712	0.514064	0.29214	0	Replicate 3
	ECM conc (nM)	80	40	20	10	5	2.5	1.25	0.625	0
	Coated ECM
	FN	0.809637	0.820931	0.821139	0.692453	0.67151	0.718643	0.600536	0.51344	0.135923	Replicate 1
	FN	0.779424	0.774073	0.874484	0.764389	0.763433	0.698314	0.509596	0.382613	0	Replicate 2
	FN	0.801657	0.741039	0.787024	0.772132	0.688256	0.72409	0.618366	0.402043	0.131073	Replicate 3
	LN511-E8	0.813991	0.755697	0.920793	0.935476	0.87699	0.912137	0.573186	0.648743	0.10093	Replicate 1
	LN511-E8	0.809672	0.886811	0.761726	0.768955	0.792363	0.892325	0.697936	0.712982	0.126511	Replicate 2
	LN511-E8	0.902559	0.761417	0.962019	0.860272	0.945847	0.982016	0.731618	0.67823	0	Replicate 3
	SF-TY
	ECM conc (nM)	80	40	20	10	5	2.5	1.25	0.625	0
	Coated ECM
	EGFL6	0.395891	0.28968	0.104896	0.0580102	0.0559764	0.107513	0.0595002	0.0238661	0	Replicate 1
	EGFL6	0.392941	0.292172	0.13289	0.041694	0.0883247	0.103356	0.0391658	0.0530098	0.0225517	Replicate 2
	EGFL6	0.346983	0.283681	0.127701	0.0693726	0.107182	0.10107	0.0281839	0.0500551	0.028157	Replicate 3
	NPNT	0.49042	0.536933	0.511158	0.490603	0.426595	0.335755	0.242841	0.150168	0.0205986	Replicate 1
	NPNT	0.524318	0.539341	0.525897	0.493341	0.421241	0.354988	0.246045	0.152331	0	Replicate 2
	NPNT	0.47353	0.601698	0.587056	0.527326	0.428984	0.370148	0.272603	0.150837	0.0105726	Replicate 3
	ECM conc (nM)	80	40	20	10	5	2.5	1.25	0.625	0
	Coated ECM
	FN	0.616154	0.642362	0.624016	0.651886	0.609115	0.575075	0.517391	0.499581	0.0330549	Replicate 1
	FN	0.600854	0.63907	0.664986	0.660109	0.606964	0.580374	0.52895	0.521639	0.0649319	Replicate 2
	FN	0.621927	0.642861	0.622938	0.590374	0.569783	0.52018	0.458205	0.381541	0	Replicate 3
	LN511-E8	0.64105	0.657877	0.695094	0.5714	0.605497	0.537369	0.590086	0.658082	0.0497283	Replicate 1
	LN511-E8	0.625352	0.697111	0.645265	0.634991	0.570228	0.555259	0.479408	0.657346	0	Replicate 2
	LN511-E8	0.63289	0.682648	0.627008	0.667182	0.704016	0.602264	0.593326	0.778171	0.0498398	Replicate 3
	NTI-4
	ECM conc (nM)	80	40	20	10	5	2.5	1.25	0.625	0
	Coated ECM
	EGFL6	0.11913	0.482327	0.604887	0.440668	-0.0297956	0.0536033	0.0991327	0.0763103	0	Replicate 1
	EGFL6	0.0394134	0.455153	0.573713	0.333517	-0.0591014	-0.0152301	-0.0213534	0.446903	0.18463	Replicate 2
	EGFL6	0.0565829	0.356716	0.482653	0.278587	-0.158831	-0.0499255	0.165144	0.173316	0.0547511	Replicate 3
	NPNT	1.12601	1.12636	1.0581	0.825881	0.641276	0.368045	0.140534	0.0320758	0.0731001	Replicate 1
	NPNT	1.0251	1.19996	1.16	0.857725	0.575947	0.247608	0.141601	0.122967	0.0924428	Replicate 2
	NPNT	0.970657	1.20692	1.08659	0.776532	0.514582	0.190157	0.147641	0.0648569	0	Replicate 3
	ECM conc (nM)	80	40	20	10	5	2.5	1.25	0.625	0
	Coated ECM
	FN	1.66565	1.88797	1.98391	1.90269	2.05269	2.00569	1.98697	2.03844	0.0536658	Replicate 1
	FN	1.6591	1.82207	1.98404	2.08686	2.03203	1.91366	2.04383	2.31767	0.0579499	Replicate 2
	FN	1.75714	1.88046	1.98238	2.04847	2.0571	2.10502	2.0785	2.29434	0	Replicate 3
	LN511-E8	2.12725	2.14054	1.89086	1.8755	1.38084	1.96551	2.05964	1.85435	0.147845	Replicate 1
	LN511-E8	1.94492	1.97707	2.17245	2.16086	2.29562	2.06328	2.13365	2.05555	0	Replicate 2
	LN511-E8	1.9061	2.09767	2.12957	2.35511	1.91521	2.0773	2.33076	2.27	0.0181595	Replicate 3
	HT-1080
	ECM conc (nM)	80	40	20	10	5	2.5	1.25	0.625	0
	Coated ECM
	EGFL6	0.0426646	0.0247423	0.0167586	-0.00208798	0.00695972	-0.000541658	-0.00156539	0.0105481	0.00980103	Replicate 1
	EGFL6	0.0262507	0.0171992	0.00251434	-0.00215301	0.000164418	-0.00263867	-0.00273095	-0.000422111	0	Replicate 2
	EGFL6	0.0277666	0.0147089	0.00792531	-0.00015473	0.00295316	0.0112626	0.00253578	0.00472682	0.0064512	Replicate 3
	NPNT	0.0302041	0.0199134	0.0088761	-0.000660972	0.00825749	-0.000287025	0.00545575	0.00865952	0.00796216	Replicate 1
	NPNT	0.0304059	0.0231166	0.00940854	0.0180484	0.000287902	-0.00168716	0.00738258	0.00402523	0	Replicate 2
	NPNT	0.0404731	0.0251847	0.0138222	0.00743918	0.0026305	0.00401067	0.00121268	0.00186478	0.00470171	Replicate 3
	ECM conc (nM)	80	40	20	10	5	2.5	1.25	0.625	0
	Coated ECM
	FN	0.442584	0.440162	0.440244	0.394019	0.260668	0.104387	0.00957633	-0.00736507	0	Replicate 1
	FN	0.416073	0.411021	0.413712	0.406955	0.262609	0.104603	0.000113108	-0.00669242	0.00181108	Replicate 2
	FN	0.417004	0.405352	0.440284	0.396926	0.269776	0.0974151	0.00533568	0.00379645	0.00322494	Replicate 3
	LN511-E8	0.413666	0.422766	0.430917	0.439921	0.397886	0.462612	0.46952	0.428504	0.000709645	Replicate 1
	LN511-E8	0.402409	0.41731	0.455176	0.456861	0.423654	0.512959	0.466554	0.43378	0	Replicate 2
	LN511-E8	0.440012	0.428727	0.443391	0.456619	0.465774	0.468451	0.454854	0.433074	0.00735444	Replicate 3
	K562
	ECM conc (nM)	80	40	20	10	5	2.5	1.25	0.625	0
	Coated ECM
	EGFL6	0.0704731	0.0699525	0.0614389	0.0592338	0.0623788	0.11041	0.0943381	0.0686404	0.116121	Replicate 1
	EGFL6	0.0513953	0.0457957	0.0356804	0.0538792	0.071171	0.0212675	0.0319481	0.0398123	0	Replicate 2
	EGFL6	0.0347381	0.0408584	0.0594873	0.0434936	0.0230567	0.0249288	0.0303204	0.0481539	0.0404856	Replicate 3
	NPNT	-0.0411489	-0.0536513	0.0136274	0.0142818	0.0108221	0.0123824	0.0292694	0.0370262	0	Replicate 1
	NPNT	-0.0313982	-0.0174795	0.0135117	0.0281735	0.0092974	0.0159433	0.0499951	0.0523797	0.0562206	Replicate 2
	NPNT	-0.0279333	-0.00699003	0.0288849	0.0563045	0.0402507	0.0544503	0.0797271	0.098854	0.0839625	Replicate 3
	ECM conc (nM)	80	40	20	10	5	2.5	1.25	0.625	0
	Coated ECM
	FN	0.735848	0.727649	0.719345	0.648361	0.58095	0.424905	0.287872	0.193986	0.108812	Replicate 1
	FN	0.746524	0.674715	0.674611	0.612759	0.522407	0.388133	0.305547	0.149913	0	Replicate 2
	FN	0.724338	0.672762	0.661297	0.583072	0.49251	0.377124	0.227701	0.172248	0.0143427	Replicate 3
	LN511-E8	0.587225	0.393174	0.349904	0.235187	0.19247	0.138234	0.130381	0.156767	0	Replicate 1
	LN511-E8	0.62672	0.391485	0.322213	0.248538	0.203644	0.163291	0.0841845	0.083727	0.0503531	Replicate 2
	LN511-E8	0.61821	0.402086	0.290401	0.246507	0.176221	0.127687	0.119719	0.0887991	-7.41015e-05	Replicate 3
	K562-a8
	ECM conc (nM)	80	40	20	10	5	2.5	1.25	0.625	0
	Coated ECM
	EGFL6	0.114182	0.0553737	0.0408312	0.0116447	0.0143759	0.0193168	0.0221725	0.00651107	0	Replicate 1
	EGFL6	0.0946196	0.0362199	0.0128415	0.010511	0.0407781	0.00577126	0.0173741	0.0183597	0.0395858	Replicate 2
	EGFL6	0.143946	0.0522293	0.0539334	0.0437773	0.0107789	0.0408449	0.0263864	0.0410622	0.0263472	Replicate 3
	NPNT	0.503117	0.520832	0.51461	0.48969	0.445524	0.390921	0.306421	0.273773	0	Replicate 1
	NPNT	0.4933	0.51686	0.515975	0.469696	0.43791	0.419518	0.32601	0.250041	0.0181818	Replicate 2
	NPNT	0.492188	0.549068	0.497699	0.549464	0.468049	0.407212	0.302387	0.327199	0.0528754	Replicate 3
	ECM conc (nM)	80	40	20	10	5	2.5	1.25	0.625	0
	Coated ECM
	FN	0.686131	0.689497	0.685835	0.762284	0.590068	0.496946	0.301707	0.173172	0.0222265	Replicate 1
	FN	0.672081	0.656242	0.712635	0.734044	0.576678	0.514055	0.282763	0.153153	0	Replicate 2
	FN	0.625418	0.647341	0.651661	0.694732	0.530403	0.451749	0.229586	0.115978	0.00275006	Replicate 3
	LN511-E8	0.594869	0.443685	0.230825	0.208764	0.13935	0.105244	0.0664047	0.0495396	0	Replicate 1
	LN511-E8	0.580866	0.417792	0.220817	0.261669	0.127301	0.112628	0.0967262	0.066971	0.0311928	Replicate 2
	LN511-E8	0.633355	0.441756	0.298759	0.247034	0.185633	0.146879	0.0850106	0.0731039	0.0187638	Replicate 3
		Mean absorbance at 80 nM ECM conc.						Normalize the maximum absorbance of each cell line to 1.00
			EGFL6	NPNT	FN	LN511-E8		EGFL6	NPNT	FN
		Keratinocyte	0.038	0.047	0.583	0.772		0.05	0.06	0.75
		HEC293	0.035	0.67	1.049	1.035		0.03	0.64	1
		T98G	0.41	0.902	0.903	0.898		0.45	1	1
		KG-1-C	0.538	0.621	0.797	0.842	----->	0.64	0.74	0.95
		SF-TY	0.379	0.496	0.613	0.633		0.6	0.78	0.97
		NT1-4	0.072	1.041	1.694	1.993		0.04	0.52	0.85
		HT-1080	0.032	0.033	0.425	0.419		0.08	0.08	1
		K562	0.052	0	0.736	0.611		0.07	0	1
		K562-a8	0.118	0.496	0.661	0.603		0.18	0.75	1
								0	0.33	0.66
