# Supplementary material for: Hair follicle epidermal stem cells define a niche for tactile sensation
Source: eLife. 2018 Oct 25;7:e38883. doi: 10.7554/eLife.38883 (PMC6226291; doi:10.7554/eLife.38883)
Supplement: Figure 4—source data 1. [file elife-38883-fig4-data1.xlsx]

## Sheet: Figure 4
Figure 4–source data 1: Raw numerical data for Figure 4 and associated figure supplements
	Figure 4C. Statistics source data											Figure 4D. Statistics source data																	Figures 4E, F, G. Statistics source data
	Axon overlaps/hair follicle					Protrusion overlaps/tSC						Mouse	Fiber	Geno-	Day of	Day of	Age	BW	Preparation	Activation	CV	Spontaneous	RF size	VFH	Mech. Th.	Mech. mag.			Mouse	Fiber	Geno-	4R	4C	8R	8C	16R	16C	32R	32C	64R	64C	128R	128C	256R	256C	512R	512C	768R	768C
	Hair follicle ID	WT	Hair follicle ID	Egfl6 KO		tSC number	WT	tSC number	Egfl6 KO			ID	ID	type	Exp.	Birth	(w)	(g)	Lt / Rt	Th. (V)	(m/s)	Discharge Rate (imp/s)	(mm2)	Th. (mN)	(μm)	(net spikes)			ID	ID	type
	Mouse 1: follicle1	5	Mouse 1: follicle1	6		1	0	1	4			31147	Eg007	WT	2015_0121	2014_1112	10	29	Lt	7	9.2	0	13.3333	0.833438	256	6			31147	Eg007	WT	0	0	0	0	0	0	0	0	0	0	0	0	1	0	3	0	1	0
	Mouse 1: follicle2	1	Mouse 1: follicle2	10		2	0	2	5			31147	Eg008	WT	2015_0121	2014_1112	10	29	Lt	2.6	8	0	4.7343	1.97628	32	54			31147	Eg008	WT	0	0	0	0	0	0	0	1	0	3	2	5	1	7	5	10	4	6
	Mouse 1: follicle3	6	Mouse 1: follicle3	10		3	0	3	3			31147	Eg009	WT	2015_0121	2014_1112	10	29	Lt	3.1	6.28571	0	6.23188	0.510179	768	21			31147	Eg009	WT	0	0	0	0	0	0	0	0	0	0	0	0	0	0	0	0	0	4
	Mouse 1: follicle4	1	Mouse 1: follicle4	2		4	0	4	2			31147	Eg010	WT	2015_0121	2014_1112	10	29	Lt	3.2	5.14286	0	10.9179	0.833438	256	225			31147	Eg010	WT	0	0	0	0	0	0	0	0	0	0	0	0	0	1	1	6	11	24
	Mouse 1: follicle5	3	Mouse 1: follicle5	7		5	0	5	3			31147	Eg011	WT	2015_0121	2014_1112	10	29	Lt	3.3	7.69231	0	19.4203	0.833438	256	210			31147	Eg011	WT	0	0	0	0	0	0	0	0	0	0	0	0	0	3	1	21	2	26
	Mouse 1: follicle6	2	Mouse 1: follicle6	5		6	1	6	4			31147	Eg012	WT	2015_0121	2014_1112	10	29	Lt	4.6	6.77419	0	4.54106	1.97628	512	55			31147	Eg012	WT	0	0	0	0	0	0	0	0	0	0	0	0	0	0	0	2	0	10
	Mouse 1: follicle7	1	Mouse 1: follicle7	6		7	0	7	9			31147	Eg013	WT	2015_0121	2014_1112	10	29	Lt	2.8	8.46154	0	13.285	3.23157	64	264			31147	Eg013	WT	0	0	0	0	0	0	0	0	1	1	0	3	1	7	4	16	9	30
	Mouse 1: follicle8	1	Mouse 1: follicle8	5		8	1	8	4			31149	Eg025	WT	2015_0205	2014_1112	12	27	Lt	3	5.66667	0	5.89372	0.833438	256	8			31149	Eg025	WT	0	0	0	0	0	0	0	0	0	0	0	0	4	0	3	0	0	0
	Mouse 1: follicle9	5	Mouse 1: follicle9	3		9	0	9	3			31149	Eg026	WT	2015_0205	2014_1112	12	27	Lt	4	3.91892	0	13.3333	0.833438	512	1			31149	Eg026	WT	0	0	0	0	0	0	0	0	0	0	0	0	0	0	0	1	0	0
	Mouse 1: follicle10	1	Mouse 1: follicle10	6		10	0	10	4			31149	Eg027	WT	2015_0205	2014_1112	12	27	Lt	3	6.19048	0	15.7005	1.30236	64	105			31149	Eg027	WT	0	0	0	0	0	0	0	0	0	1	5	1	12	6	19	26	13	11
	Mouse 2: follicle1	1	Mouse 1: follicle11	4		11	0	11	4			31149	Eg028	WT	2015_0205	2014_1112	12	27	Lt	1	5.58824	0	8.59903	3.23157	32	10			31149	Eg028	WT	0	0	0	0	0	0	0	1	0	1	0	4	0	1	0	0	0	0
	Mouse 2: follicle2	2	Mouse 2: follicle1	15		12	0	12	4			31149	Eg029	WT	2015_0205	2014_1112	12	27	Lt	1.4	7.30769	0	4.83092	0.510179	256	9			31149	Eg029	WT	0	0	0	0	0	0	0	0	0	0	0	0	0	3	1	2	0	2
	Mouse 2: follicle3	5	Mouse 2: follicle2	3		13	0	13	6			31149	Eg031	WT	2015_0205	2014_1112	12	27	Lt	1.4	7.30769	0	4.83092	0.510179	256	9			31149	Eg031	WT	0	0	0	0	0	0	0	0	0	0	0	0	0	2	2	9	9	20
	Mouse 2: follicle4	2	Mouse 2: follicle3	5		14	0	14	1			31149	Eg032	WT	2015_0205	2014_1112	12	27	Lt	2	7.10526	0	6.18357	3.23157	256	71			31149	Eg032	WT	0	0	0	0	0	0	0	1	0	2	0	2	1	3	4	9	17	20
	Mouse 2: follicle5	4	Mouse 2: follicle4	8		15	0	15	3			31149	Eg034	WT	2015_0205	2014_1112	12	27	Lt	2.6	6.85714	0	4.7343	3.23157	32	190			31149	Eg034	WT	0	0	0	0	0	0	0	1	0	1	1	5	4	17	6	46	1	56
	Mouse 2: follicle6	0	Mouse 2: follicle5	2		16	0	16	3			31150	Eg035	WT	2015_0206	2014_1112	12	27	Lt	5	4	0	8.64734	0.833438	768	28			31150	Eg035	WT	0	0	0	0	0	0	0	0	0	0	0	0	0	0	0	0	11	4
	Mouse 2: follicle7	3	Mouse 2: follicle6	2		17	1	17	2			31150	Eg036	WT	2015_0206	2014_1112	12	27	Lt	4	6.57143	0	8.59903	0.510179	1024	5			31150	Eg036	WT	0	0	0	0	0	0	0	0	0	0	0	0	0	0	0	0	0	0
	Mouse 2: follicle8	2	Mouse 2: follicle7	7		18	0	18	3			31150	Eg038	WT	2015_0206	2014_1112	12	27	Lt	2	7.75	0	2.02899	3.23157	128	50			31150	Eg038	WT	0	0	0	0	0	0	0	0	0	0	2	0	7	0	13	2	13	2
	Mouse 2: follicle9	3	Mouse 2: follicle8	0		19	0	19	2			31150	Eg039	WT	2015_0206	2014_1112	12	27	Lt	12	1.82609	0	3.1401	1.97628	256	23			31150	Eg039	WT	0	0	0	0	0	0	0	0	0	0	0	0	0	1	1	3	8	9
	Mouse 2: follicle10	2	Mouse 2: follicle9	9		20	1	20	3			31150	Eg040	WT	2015_0206	2014_1112	12	27	Lt	7	8.22222	0	6.47343	1.30236	32	26			31150	Eg040	WT	0	0	0	0	0	0	1	1	2	3	4	3	4	3	1	0	3	0
	Mouse 2: follicle11	4	Mouse 2: follicle10	11		21	0	21	0			31150	Eg042	WT	2015_0206	2014_1112	12	27	Lt	2	5.26316	0	10.5314	1.97628	4	156			31150	Eg042	WT	1	1	2	0	4	1	6	3	8	6	9	9	6	10	6	9	17	5
	Mouse 3: follicle1	2	Mouse 2: follicle11	12		22	0	22	3			31150	Eg043	WT	2015_0206	2014_1112	12	27	Lt	3	3.4	0	8.74396	1.97628	256	93			31150	Eg043	WT	0	0	0	0	0	0	0	0	0	0	0	0	1	2	3	7	2	30
	Mouse 3: follicle2	1	Mouse 3: follicle1	1		23	0	23	3			31150	Eg044	WT	2015_0206	2014_1112	12	27	Lt	4	3.86364	0	13.3816	0.833438	8	38			31150	Eg044	WT	0	0	0	1	0	1	0	1	0	2	0	3	0	2	0	2	1	6
	Mouse 3: follicle3	1	Mouse 3: follicle2	8		24	0	24	4														Median	1.30236							Mean	0.0434783	0.0434783	0.0869565	0.0434783	0.173913	0.0869565	0.304348	0.391304	0.478261	0.869565	1	1.52174	1.82609	2.95652	3.17391	7.43478	5.30435	11.5217
	Mouse 3: follicle4	4	Mouse 3: follicle3	10		25	1	25	4														IQR (25%)	0.833438							SEM	0.0434783	0.0434783	0.0869565	0.0434783	0.173913	0.0600739	0.262511	0.150613	0.354918	0.309943	0.461994	0.498494	0.636977	0.858527	0.956881	2.29781	1.23588	2.94003
	Mouse 3: follicle5	1	Mouse 3: follicle4	2		26	0	26	7														IQR (75%)	1.97628
	Mouse 3: follicle6	4	Mouse 3: follicle5	3		27	1	27	6
	Mouse 3: follicle7	1	Mouse 3: follicle6	0		28	2	28	4			Mouse	Fiber	Geno-	Day of	Day of	Age	BW	Preparation	Activation	CV	Spontaneous	RF size	VFH	Mech. Th.	Mech. mag.			Mouse	Fiber	Geno-	4R	4C	8R	8C	16R	16C	32R	32C	64R	64C	128R	128C	256R	256C	512R	512C	768R	768C
	Mouse 3: follicle8	1	Mouse 3: follicle7	7		29	0	29	5			ID	ID	type	Exp.	Birth	(w)	(g)	Lt / Rt	Th. (V)	(m/s)	Discharge Rate (imp/s)	(mm2)	Th. (mN)	(μm)	(net spikes)			ID	ID	type
	Mouse 3: follicle9	0	Mouse 3: follicle8	2		30	1	30	1			31148	Eg015	Egfl6 -/Y	2015_0204	2014_1112	12	31	Lt	3	6.33333	0	7.343	3.23157	1280	1			31148	Eg015	Egfl6 -/Y	0	0	0	0	0	0	0	0	0	0	0	0	0	0	0	0	0	0
	Mouse 3: follicle10	1	Mouse 3: follicle9	2		31	1	31	3			31148	Eg016	Egfl6 -/Y	2015_0204	2014_1112	12	31	Lt	4	7.33333	0	3.1401	3.23157	768	7			31148	Eg016	Egfl6 -/Y	0	0	0	0	0	0	0	0	0	0	0	0	0	0	0	0	0	1
	Mouse 3: follicle11	0	Mouse 3: follicle10	2		32	0	32	1			31148	Eg019	Egfl6 -/Y	2015_0204	2014_1112	12	31	Lt	2	4.5	0	8.64734	3.23157	1024	13			31148	Eg019	Egfl6 -/Y	0	0	0	0	0	0	0	0	0	0	0	0	0	0	0	0	0	0
	Total (n = 32 follicles)	70	Mouse 3: follicle11	6		33	0	33	1			31148	Eg020	Egfl6 -/Y	2015_0204	2014_1112	12	31	Lt	6	9.16667	0	6.03865	3.23157	32	135			31148	Eg020	Egfl6 -/Y	0	0	0	0	0	0	1	0	0	1	0	0	1	0	14	0	17	3
	Mean	2.1875	Total (n = 33 follicles)	181		34	0	34	1			31148	Eg021	Egfl6 -/Y	2015_0204	2014_1112	12	31	Lt	6	9.64286	0	4.83092	1.97628	1024	6			31148	Eg021	Egfl6 -/Y	0	0	0	0	0	0	0	0	0	0	0	0	0	0	0	0	0	0
	SEM	0.292506	Mean	5.48485		35	0	35	3			31148	Eg022	Egfl6 -/Y	2015_0204	2014_1112	12	31	Lt	5	8.09524	0	4.83092	1.30236	768	2			31148	Eg022	Egfl6 -/Y	0	0	0	0	0	0	0	0	0	0	0	0	0	0	0	0	0	1
			SEM	0.648602		36	0	36	3			31148	Eg023	Egfl6 -/Y	2015_0204	2014_1112	12	31	Lt	2	5	0	13.0918	3.23157	1280	3			31148	Eg023	Egfl6 -/Y	0	0	0	0	0	0	0	0	0	0	0	0	0	0	0	0	0	0
						37	0	37	2			31148	Eg024	Egfl6 -/Y	2015_0204	2014_1112	12	31	Lt	2	7.27273	0	6.47343	3.23157	768	1			31148	Eg024	Egfl6 -/Y	0	0	0	0	0	0	0	0	0	0	0	0	0	0	0	0	0	1
						38	0	38	3			31153	Eg046	Egfl6 -/Y	2015_0210	2014_1117	12	30	Lt	2	4.70588	0	2.70531	1.97628	1280	4			31153	Eg046	Egfl6 -/Y	0	0	0	0	0	0	0	0	0	0	0	0	0	0	0	0	0	0
						39	3	39	3			31153	Eg047	Egfl6 -/Y	2015_0210	2014_1117	12	30	Lt	8	9	0	3.42995	1.30236	256	46			31153	Eg047	Egfl6 -/Y	0	0	0	0	0	0	0	0	0	0	0	0	0	4	1	6	7	2
						40	0	40	5			31153	Eg049	Egfl6 -/Y	2015_0210	2014_1117	12	30	Lt	3	7.71429	0	7.29469	1.97628	16	3			31153	Eg049	Egfl6 -/Y	0	0	0	0	1	0	0	0	0	0	0	0	0	0	0	0	0	0
						41	0	41	2			31153	Eg051	Egfl6 -/Y	2015_0210	2014_1117	12	30	Lt	9	4.53125	0	13.0918	0.510179	64	127			31153	Eg051	Egfl6 -/Y	0	0	0	0	0	0	0	0	0	3	0	7	1	5	3	7	2	18
						42	0	42	2			31153	Eg052	Egfl6 -/Y	2015_0210	2014_1117	12	30	Lt	3	9.64286	0	2.17391	1.97628	1024	7			31153	Eg052	Egfl6 -/Y	0	0	0	0	0	0	0	0	0	0	0	0	0	0	0	0	0	0
						43	0	43	3			31153	Eg053	Egfl6 -/Y	2015_0210	2014_1117	12	30	Lt	15	1.56863	0	2.89855	3.23157	1280	3			31153	Eg053	Egfl6 -/Y	0	0	0	0	0	0	0	0	0	0	0	0	0	0	0	0	0	0
						44	0	44	1			31153	Eg054	Egfl6 -/Y	2015_0210	2014_1117	12	30	Lt	9	3.75	0	8.64734	3.23157	512	3			31153	Eg054	Egfl6 -/Y	0	0	0	0	0	0	0	0	0	0	0	0	0	0	0	1	0	1
						45	0	45	3			31154	Eg055	Egfl6 -/Y	2015_0213	2014_1117	12	28	Lt	2	6.4	0	6.47343	3.23157	512	4			31154	Eg055	Egfl6 -/Y	0	0	0	0	0	0	0	0	0	0	0	0	0	0	0	1	0	2
						46	0	46	3			31154	Eg056	Egfl6 -/Y	2015_0213	2014_1117	12	28	Lt	2	8.05556	0	3.42995	1.97628	256	4			31154	Eg056	Egfl6 -/Y	0	0	0	0	0	0	0	0	0	0	0	0	0	1	0	0	1	1
						47	0	47	2			31154	Eg057	Egfl6 -/Y	2015_0213	2014_1117	12	28	Lt	7	8.57143	0	1.93237	3.23157	512	53			31154	Eg057	Egfl6 -/Y	0	0	0	0	0	0	0	0	0	0	0	0	0	0	0	29	0	24
						48	0	48	5			31154	Eg058	Egfl6 -/Y	2015_0213	2014_1117	12	28	Lt	0.6	8.46154	0	2.07729	3.23157	768	3			31154	Eg058	Egfl6 -/Y	0	0	0	0	0	0	0	0	0	0	0	0	0	0	0	0	0	1
						49	0	Total (n = 48 follicles)	155			31154	Eg059	Egfl6 -/Y	2015_0213	2014_1117	12	28	Lt	3	8.57143	0	8.55072	3.23157	512	93			31154	Eg059	Egfl6 -/Y	0	0	0	0	0	0	0	0	0	0	0	0	0	0	0	2	4	8
						50	0	Mean	3.22917			31154	Eg060	Egfl6 -/Y	2015_0213	2014_1117	12	28	Lt	0.7	9.28571	0	7.00483	1.97628	1280	0			31154	Eg060	Egfl6 -/Y	0	0	0	0	0	0	0	0	0	0	0	0	0	0	0	0	0	0
						51	1	SEM	0.242328			31154	Eg061	Egfl6 -/Y	2015_0213	2014_1117	12	28	Lt	2	8.06452	0	10.5314	0.833438	256	182			31154	Eg061	Egfl6 -/Y	0	0	0	0	0	0	0	0	0	0	0	0	0	1	0	26	2	33
						52	0					31154	Eg062	Egfl6 -/Y	2015_0213	2014_1117	12	28	Lt	3	5.95238	0	9.13043	3.23157	512	155			31154	Eg062	Egfl6 -/Y	0	0	0	0	0	0	0	0	0	0	0	0	0	0	0	8	6	9
						53	0					31154	Eg064	Egfl6 -/Y	2015_0213	2014_1117	12	28	Lt	5	6.15385	0	3.42995	1.97628	768	4			31154	Eg064	Egfl6 -/Y	0	0	0	0	0	0	0	0	0	0	0	0	0	0	0	0	0	3
						54	2																Median	3.23157							Mean	0	0	0	0	0.0416667	0	0.0416667	0	0	0.166667	0	0.291667	0.0833333	0.458333	0.75	3.33333	1.625	4.5
						55	3																IQR (25%)	1.97628							SEM	0	0	0	0	0.0416667	0	0.0416667	0	0	0.130032	0	0.291667	0.0576303	0.262231	0.590535	1.59559	0.779754	1.74456
						56	0																IQR (75%)	3.23157
						57	0
						58	0
						59	0
						60	1
						61	0
						62	4
						63	1
						64	1
						65	0
						66	0
						67	0
						68	0
						69	0
						70	0
						71	3
						72	0
						73	0
						Total (n = 73 follicles)	29
						Mean	0.39726
						SEM	0.0989667
[truncated: 31 more columns]
