# Supplementary material for: Hair follicle epidermal stem cells define a niche for tactile sensation
Source: eLife. 2018 Oct 25;7:e38883. doi: 10.7554/eLife.38883 (PMC6226291; doi:10.7554/eLife.38883)
Supplement: Figure 5—source data 1. [file elife-38883-fig5-data1.xlsx]

## Sheet: Figure 5
Figure 5–source data 1: Raw numerical data for Figure 5 and associated figure supplements
	Figure 5B. Statistics source data						Figure 5C. Statistics source data							Figure 5D. Heat-map source data																		Figure 5G. Statistics source data
														Raw data									Raw data/average									Raw data									Raw data/average
		Perimeter (mm)						Perimeter (mm)						P20 telogen									P20 telogen									Unpluckied									Unpluckied
	Hair follicle ID	Telogen (P20)	Anagen (P35)	Telogen (P49)			Hair follicle ID	P35 New	P35 Old	P49 New	P49 Old			EGFL6									EGFL6									EGFL6									EGFL6
	Mouse1: follicle1	69.506	133.6	141			Mouse1: follicle1	91.9	41.7	88.4	52.6				0-60	60-120	120-180	180-240	240-300	300-360	average			0-60	60-120	120-180	180-240	240-300	300-360				0-60	60-120	120-180	180-240	240-300	300-360	average			0-60	60-120	120-180	180-240	240-300	300-360
	Mouse1: follicle2	69.571	133.8	108.4			Mouse1: follicle2	90.4	43.4	63.2	45.2			Haiir follicle 1	1	1.15759	0.921897	0.942765	1.02747	1.34663	1.06606		Haiir follicle 1	0.938035	1.08586	0.864772	0.884347	0.9638	1.26319			Haiir follicle 1	1	0.150672	0.742529	0.277801	0.180983	1.23895	0.598489		Haiir follicle 1	1.67087	0.251753	1.24067	0.46417	0.302399	2.07013
	Mouse1: follicle3	67.244	131.8	132			Mouse1: follicle3	91	40.8	81.5	50.5			Haiir follicle 2	1	0.858456	0.997243	0.853676	0.472426	0.689338	0.811857		Haiir follicle 2	1.23174	1.0574	1.22835	1.05151	0.581909	0.849089			Haiir follicle 2	1	0.412659	0.448573	0.484278	0.0483337	0.891753	0.547599		Haiir follicle 2	1.82615	0.753578	0.819162	0.884366	0.0882647	1.62848
	Mouse1: follicle4	67.597	136	121.1			Mouse1: follicle4	91.5	44.5	74.5	46.6			Haiir follicle 3	1	0.720077	1.01931	0.699807	0.809846	1.26544	0.91908		Haiir follicle 3	1.08804	0.783476	1.10905	0.761421	0.881148	1.37686			Haiir follicle 3	1	1.79022	0.306865	0.37656	0.981725	1.84223	1.0496		Haiir follicle 3	0.952743	1.70562	0.292364	0.358765	0.935331	1.75517
	Mouse1: follicle5	67.833	128.2	109.6			Mouse1: follicle5	88.4	39.8	59.1	50.5			Haiir follicle 4	1	1.13037	0.830061	0.699387	0.686503	0.822086	0.861401		Haiir follicle 4	1.1609	1.31224	0.963618	0.811918	0.796961	0.954359			Haiir follicle 4	1	0.700744	0.343281	0.941572	0.925926	0.882332	0.798976		Haiir follicle 4	1.2516	0.877053	0.429652	1.17847	1.15889	1.10433
	Mouse1: follicle6	65.705	135.9	105.6			Mouse1: follicle6	97	38.9	57.5	48.1			Haiir follicle 5	1	0.963303	1.45216	0.93578	0.946483	0.842726	1.02341		Haiir follicle 5	0.977126	0.941269	1.41895	0.914375	0.924834	0.82345			Haiir follicle 5	1	0.691542	0.041791	0.397655	1.1005	1.36567	0.766193		Haiir follicle 5	1.30515	0.902569	0.0545438	0.519001	1.43632	1.78241
	Mouse1: follicle7	67.916	132.7	120			Mouse1: follicle7	87.5	45.2	71.5	48.5			Haiir follicle 6	1	1.02423	1.51175	0.969982	0.650995	1.07595	1.03882		Haiir follicle 6	0.962632	0.985958	1.45526	0.933736	0.626668	1.03574			Haiir follicle 6	1	0.370173	0.724948	0.350318	0.590678	0.920883	0.6595		Haiir follicle 6	1.5163	0.561293	1.09924	0.531187	0.895645	1.39633
	Mouse1: follicle8	66.559	113.1	108.6			Mouse1: follicle8	81.4	31.7	58.7	49.9			Haiir follicle 7	1	0.714029	0.647482	1.48741	1.11691	1.47302	1.07314		Haiir follicle 7	0.931844	0.665363	0.603352	1.38603	1.04078	1.37263			Haiir follicle 7	1	0.195514	0.260707	0.0746868	0.496584	0.918869	0.49106		Haiir follicle 7	2.03641	0.398146	0.530906	0.152093	1.01125	1.8712
	Mouse1: follicle9	67.846	139	133.9			Mouse1: follicle9	96.2	42.8	85.9	48			Haiir follicle 8	1	0.858832	1.3762	1.24427	0.786401	1.43016	1.11598		Haiir follicle 8	0.896076	0.769579	1.23318	1.11496	0.704675	1.28153			Haiir follicle 8	1	0.646885	0.379742	0.461944	0.231499	0.355635	0.512618		Haiir follicle 8	1.95077	1.26193	0.740791	0.901147	0.451601	0.693763
	Mouse1: follicle10	68.556	130.2	105.1			Mouse1: follicle10	88.5	41.7	61.1	44			Haiir follicle 9	1	0.753472	0.875	1.4	0.800347	1.13368	0.99375		Haiir follicle 9	1.00629	0.758211	0.880503	1.40881	0.805381	1.14081			Haiir follicle 9	1	1.14423	1.24288	0.4359	0.195649	1.94014	0.993132		Haiir follicle 9	1.00691	1.15214	1.25147	0.438914	0.197002	1.95356
	Mouse2: follicle1	62.228	139.4	112.1			Mouse2: follicle1	91.3	48.1	64	48.1			Haiir follicle 10	1	1.14968	0.953344	0.539914	0.42589	1.22816	0.88283		Haiir follicle 10	1.13272	1.30226	1.07987	0.611572	0.482415	1.39116			Haiir follicle 10	1	0.597422	0.156078	0.663381	1.16789	0.71498	0.716625		Haiir follicle 10	1.39543	0.833661	0.217796	0.925702	1.62971	0.997705
	Mouse2: follicle2	64.814	123.2	106.8			Mouse2: follicle2	81.2	42	59.8	47
	Mouse2: follicle3	68.03	140.4	123.6			Mouse2: follicle3	95.7	44.7	76.4	47.2			Nestin									nestin									Nestin									Nestin
	Mouse2: follicle4	64.061	135.1	108.8			Mouse2: follicle4	93.1	42	59.7	49.1				0-60	60-120	120-180	180-240	240-300	300-360	average			0-60	60-120	120-180	180-240	240-300	300-360				0-60	60-120	120-180	180-240	240-300	300-360	average			0-60	60-120	120-180	180-240	240-300	300-360
	Mouse2: follicle5	63.402	136.7	100.4			Mouse2: follicle5	92.7	44	56.2	44.2			Haiir follicle 1	1	1.17705	1.05606	0.390597	0.406378	0.679928	0.785002		Haiir follicle 1	1.27388	1.49942	1.34529	0.497574	0.517678	0.866148			Haiir follicle 1	1	0.131959	1.04166	0.423321	0.0968895	0.854172	0.591334		Haiir follicle 1	1.69109	0.223156	1.76155	0.715875	0.163849	1.44448
	Mouse2: follicle6	68.292	131.4	103.7			Mouse2: follicle6	90.1	41.3	58.7	45			Haiir follicle 2	1	0.785714	0.970046	1.15853	0.960829	1.2235	1.01644		Haiir follicle 2	0.98383	0.773009	0.95436	1.13979	0.945292	1.20372			Haiir follicle 2	1	0.621437	1.29356	0.999303	0.0722252	1.32275	0.88488		Haiir follicle 2	1.1301	0.702285	1.46185	1.12931	0.0816215	1.49483
	Mouse2: follicle7	65.44	136.8	110.9			Mouse2: follicle7	98.6	38.2	61.6	49.3			Haiir follicle 3	1	1.00664	1.15708	0.54646	0.665929	1.01106	0.897861		Haiir follicle 3	1.11376	1.12115	1.28871	0.608624	0.741684	1.12608			Haiir follicle 3	1	1.06009	0.181406	0.144153	1.02841	0.609725	0.670631		Haiir follicle 3	1.49113	1.58074	0.2705	0.214951	1.5335	0.909182
	Mouse2: follicle8	67.852	141.6	104.2			Mouse2: follicle8	99.3	42.3	62.8	41.4			Haiir follicle 4	1	0.756701	0.539381	1.17938	0.846186	1.3134	0.939175		Haiir follicle 4	1.06476	0.805708	0.574314	1.25576	0.900988	1.39846			Haiir follicle 4	1	0.628099	0.273363	0.924984	0.644628	0.829752	0.716804		Haiir follicle 4	1.39508	0.876249	0.381363	1.29043	0.899308	1.15757
	Mouse2: follicle9	65.748	129.5	99.4			Mouse2: follicle9	90	39.5	55.8	43.6			Haiir follicle 5	1	0.868829	1.28491	0.862247	0.840856	0.887165	0.957334		Haiir follicle 5	1.04457	0.907551	1.34217	0.900675	0.87833	0.926703			Haiir follicle 5	1	1.00813	0.146068	1.37218	1.4985	0.951237	0.996021		Haiir follicle 5	1.00399	1.01216	0.146652	1.37767	1.50449	0.955037
	Mouse2: follicle10	65.925	131.2	101.8			Mouse2: follicle10	89.1	42.1	55.4	46.4			Haiir follicle 6	1	0.843627	1.04336	0.545598	0.506176	1.23784	0.862768		Haiir follicle 6	1.15906	0.977814	1.20932	0.632381	0.586688	1.43474			Haiir follicle 6	1	0.435989	0.890285	0.425299	0.823245	1.13878	0.785599		Haiir follicle 6	1.27291	0.554977	1.13326	0.541368	1.04792	1.44957
	Mouse3: follicle1	64.89	133.7	112.1			Mouse3: follicle1	94.2	39.5	59.2	40			Haiir follicle 7	1	0.528864	0.821229	1.24767	0.977654	0.996276	0.928616		Haiir follicle 7	1.07687	0.569519	0.884358	1.34358	1.05281	1.07286			Haiir follicle 7	1	0.348553	0.488353	0.125334	0.540923	0.870662	0.562304		Haiir follicle 7	1.7784	0.619865	0.868486	0.222893	0.961976	1.54838
	Mouse3: follicle2	67.771	126.6	106.8			Mouse3: follicle2	83	43.6	60	46.4			Haiir follicle 8	1	0.459681	1.3525	0.726547	0.637126	0.947305	0.853859		Haiir follicle 8	1.17115	0.538357	1.58398	0.850898	0.746172	1.10944			Haiir follicle 8	1	0.938891	0.386772	0.597502	0.631323	0.565308	0.686633		Haiir follicle 8	1.45638	1.36738	0.563288	0.870192	0.919448	0.823304
	Mouse3: follicle3	67.531	126.3	123.6			Mouse3: follicle3	87.8	38.5	61.8	43.9			Haiir follicle 9	1	1.2284	1.07202	1.18765	0.884774	0.734568	1.0179		Haiir follicle 9	0.982414	1.20679	1.05316	1.16677	0.869214	0.721649			Haiir follicle 9	1	0.904623	1.09151	0.291755	0.162314	1.70723	0.859572		Haiir follicle 9	1.16337	1.05241	1.26983	0.339419	0.188831	1.98614
	Mouse3: follicle4	68.789	116.3	108.8			Mouse3: follicle4	83.5	32.8	51.1	40.7			Haiir follicle 10	1	0.932793	1.17748	0.908459	0.588876	0.652375	0.876664		Haiir follicle 10	1.14069	1.06403	1.34314	1.03627	0.671724	0.744157			Haiir follicle 10	1	1.12724	0.378935	0.977797	1.11965	0.874466	0.913015		Haiir follicle 10	1.09527	1.23464	0.415037	1.07095	1.22632	0.957778
	Mouse3: follicle5	65.515	118.5	100.4			Mouse3: follicle5	88.5	30	57.3	44.2
	Mouse3: follicle6	66.612	144.9	103.7			Mouse3: follicle6	111	33.9	61.6	44			bIII-tubulin									bIII-tubulin									bIII-tubulin									bIII-tubulin
	Mouse3: follicle7	64.194	134.1	110.9			Mouse3: follicle7	95.2	38.9	61	46.2				0-60	60-120	120-180	180-240	240-300	300-360	average			0-60	60-120	120-180	180-240	240-300	300-360				0-60	60-120	120-180	180-240	240-300	300-360	average			0-60	60-120	120-180	180-240	240-300	300-360
	Mouse3: follicle8	66.066	133.4	104.2			Mouse3: follicle8	96.9	36.5	76.7	41.6			Haiir follicle 1	1	1.38007	1.26701	0.672856	0.409034	0.949979	0.946492		Haiir follicle 1	1.05653	1.45809	1.33864	0.710894	0.432158	1.00368			Haiir follicle 1	1	0.426491	1.06772	2.20404	0.441776	1.98961	1.18827		Haiir follicle 1	0.841558	0.358917	0.898548	1.85482	0.37178	1.67437
	Mouse3: follicle9	65.573	132.1	99.4			Mouse3: follicle9	89.6	42.5	53.6	40.7			Haiir follicle 2	1	0.787149	0.866131	0.902811	0.788487	0.788487	0.855511		Haiir follicle 2	1.16889	0.920092	1.01241	1.05529	0.921657	0.921657			Haiir follicle 2	1	0.672418	1.26733	0.225407	0.0855131	1.25621	0.751147		Haiir follicle 2	1.3313	0.895189	1.68719	0.300084	0.113843	1.67239
	Mouse3: follicle10	66.798	131.9	101.8			Mouse3: follicle10	86.8	45.1	57.4	43.9			Haiir follicle 3	1	1.20067	1.07251	0.522766	0.801012	0.979764	0.929455		Haiir follicle 3	1.0759	1.29181	1.15392	0.562443	0.861808	1.05413			Haiir follicle 3	1	1.55228	1.53937	0.171041	1.63182	3.37098	1.54425		Haiir follicle 3	0.647564	1.0052	0.996841	0.11076	1.05671	2.18293
	Mean	66.5955	131.913	110.957			Mean	91.38	40.5333	63.7167	45.8933			Haiir follicle 4	1	0.864984	0.505818	0.713502	0.609879	0.737651	0.738639		Haiir follicle 4	1.35384	1.17105	0.684797	0.965968	0.82568	0.998663			Haiir follicle 4	1	0.590595	0.160868	0.324715	0.75657	0.818442	0.608532		Haiir follicle 4	1.6433	0.970524	0.264355	0.533605	1.24327	1.34495
	SEM	0.329389	1.30613	1.96343			SEM	1.10077	0.766787	1.7482	0.59215			Haiir follicle 5	1	0.663143	1.25995	1.04187	0.573176	0.863184	0.900221		Haiir follicle 5	1.11084	0.736644	1.3996	1.15735	0.636706	0.958858			Haiir follicle 5	1	0.97588	0.107429	0.90676	1.27767	1.18859	0.909387		Haiir follicle 5	1.09964	1.07312	0.118133	0.997112	1.40497	1.30702
														Haiir follicle 6	1	0.990853	0.676143	0.741656	0.458344	0.983931	0.808488		Haiir follicle 6	1.23688	1.22556	0.836306	0.917338	0.566915	1.217			Haiir follicle 6	1	0.256876	0.133088	0.167807	0.301538	0.640239	0.416591		Haiir follicle 6	2.40043	0.616613	0.31947	0.40281	0.723823	1.53685
														Haiir follicle 7	1	0.674528	0.462264	0.963836	0.583333	1.00472	0.781447		Haiir follicle 7	1.27968	0.863179	0.591549	1.2334	0.746479	1.28571			Haiir follicle 7	1	0.530369	0.0806223	0.100383	0.187279	0.811449	0.451684		Haiir follicle 7	2.21394	1.1742	0.178493	0.222241	0.414624	1.7965
														Haiir follicle 8	1	0.326417	1.01361	0.596609	1.10263	1.31325	0.892087		Haiir follicle 8	1.12097	0.365902	1.13622	0.668779	1.23602	1.47211			Haiir follicle 8	1	0.703098	0.316265	0.322719	0.973691	0.960897	0.712778		Haiir follicle 8	1.40296	0.986419	0.443707	0.452763	1.36605	1.3481
														Haiir follicle 9	1	0.693878	1.55329	1.64626	1.45125	0.714286	1.17649		Haiir follicle 9	0.849984	0.589785	1.32027	1.39929	1.23354	0.607131			Haiir follicle 9	1	0.91358	1.00126	0.498457	0.161808	2.70633	1.04691		Haiir follicle 9	0.955197	0.872649	0.956398	0.476124	0.154559	2.58507
														Haiir follicle 10	1	1.37906	1.26254	1.11947	0.911504	0.678887	1.05858		Haiir follicle 10	0.944666	1.30275	1.19268	1.05752	0.861067	0.641322			Haiir follicle 10	1	0.584708	0.155482	0.20297	0.617039	0.880606	0.573468		Haiir follicle 10	1.74378	1.0196	0.271126	0.353935	1.07598	1.53558
																							0							Highest											0							Highest
																								Signal intensity (A.U.)																		Signal intensity (A.U.)
														Raw data									Raw data/average									Raw data									Raw data/average
														P35 anagen									P35 anagen									Pluckied									Pluckied
														EGFL6									EGFL6									EGFL6									EGFL6
															0-60	60-120	120-180	180-240	240-300	300-360	average			0-60	60-120	120-180	180-240	240-300	300-360				0-60	60-120	120-180	180-240	240-300	300-360	average			0-60	60-120	120-180	180-240	240-300	300-360
														Haiir follicle 1	1	0.890626	0.268053	0.0513789	0.0238679	0.328224	0.427025		Haiir follicle 1	2.34178	2.08565	0.627723	0.120318	0.0558934	0.768629			Haiir follicle 1	1	0.345267	0.0460744	0.68913	0.0571958	0.811863	0.491588		Haiir follicle 1	2.03422	0.702349	0.0937256	1.40184	0.116349	1.65151
														Haiir follicle 2	1	0.622687	0.35912	0.189384	0.0646357	0.457047	0.448812		Haiir follicle 2	2.2281	1.38741	0.800156	0.421967	0.144015	1.01835			Haiir follicle 2	1	1.47736	1.26193	0.0841493	0.996328	1.41983	1.03993		Haiir follicle 2	0.961601	1.42063	1.21348	0.0809181	0.95807	1.36531
														Haiir follicle 3	1	0.805775	0.297749	0.216564	0.454071	0.600113	0.562379		Haiir follicle 3	1.77816	1.4328	0.529445	0.385086	0.807412	1.0671			Haiir follicle 3	1	0.220588	1.03575	0.409893	0.445187	0.895989	0.667901		Haiir follicle 3	1.49723	0.330271	1.55075	0.613704	0.666547	1.3415
														Haiir follicle 4	1	0.912387	0.887497	0.30401	0.656198	1.54388	0.883994		Haiir follicle 4	1.13123	1.03212	1.00396	0.343905	0.74231	1.74648			Haiir follicle 4	1	0.582573	1.25957	0.572644	0.389058	1.16054	0.827399		Haiir follicle 4	1.20861	0.704103	1.52233	0.692102	0.470218	1.40264
														Haiir follicle 5	1	0.882886	0.487498	0.166176	0.390296	1.13115	0.676334		Haiir follicle 5	1.47856	1.3054	0.720796	0.245701	0.577076	1.67247			Haiir follicle 5	1	0.321713	0.047619	0.796992	0.602415	1.24144	0.668363		Haiir follicle 5	1.49619	0.481345	0.0712473	1.19245	0.901329	1.85743
														Haiir follicle 6	1	0.39604	0.128713	0.0891089	0.658416	0.958982	0.538543		Haiir follicle 6	1.85686	0.735391	0.239002	0.165463	1.22259	1.7807			Haiir follicle 6	1	0.415045	0.755201	0.224093	0.347186	0.867964	0.601581		Haiir follicle 6	1.66229	0.689923	1.25536	0.372506	0.577122	1.4428
														Haiir follicle 7	1	0.632258	0.127957	0.410215	0.173118	1.40645	0.625		Haiir follicle 7	1.6	1.01161	0.204731	0.656344	0.276989	2.25032			Haiir follicle 7	1	0.388176	0.709565	0.570515	0.643614	0.918433	0.705051		Haiir follicle 7	1.41834	0.550565	1.0064	0.809183	0.912862	1.30265
														Haiir follicle 8	1	1.14545	0.612121	0.151515	0.127273	1.23636	0.712121		Haiir follicle 8	1.40426	1.60851	0.859574	0.212766	0.178723	1.73617			Haiir follicle 8	1	0.627106	0.773172	0.283414	0.173934	0.882815	0.623407		Haiir follicle 8	1.60409	1.00593	1.24024	0.454622	0.279006	1.41611
														Haiir follicle 9	1	0.349794	0.304527	0.337449	0.160494	1.02881	0.530178		Haiir follicle 9	1.88616	0.659767	0.574386	0.636481	0.302717	1.94049			Haiir follicle 9	1	1.0579	0.578125	1.15082	0.429452	1.55571	0.962		Haiir follicle 9	1.0395	1.09969	0.600961	1.19627	0.446416	1.61716
														Haiir follicle 10	1	0.0845638	0.0845638	0.29396	0.310067	1.16779	0.490157		Haiir follicle 10	2.04016	0.172524	0.172524	0.599726	0.632588	2.38247			Haiir follicle 10	1	0.872545	0.854199	0.430769	0.197772	1.61177	0.827843		Haiir follicle 10	1.20796	1.054	1.03184	0.520351	0.2389	1.94696
														Nestin									Nestin									Nestin									Nestin
															0-60	60-120	120-180	180-240	240-300	300-360	average			0-60	60-120	120-180	180-240	240-300	300-360				0-60	60-120	120-180	180-240	240-300	300-360	average			0-60	60-120	120-180	180-240	240-300	300-360
														Haiir follicle 1	1	0.816693	0.383348	0.0561898	0.0709598	0.546615	0.478967		Haiir follicle 1	2.08782	1.70511	0.800363	0.117315	0.148152	1.14124			Haiir follicle 1	1	0.54567	0.349713	1.03956	0.148508	0.250479	0.555654		Haiir follicle 1	1.79968	0.982032	0.629371	1.87087	0.267267	0.450782
														Haiir follicle 2	1	0.948351	0.71504	0.218923	0.0927533	0.77951	0.625763		Haiir follicle 2	1.59805	1.51551	1.14267	0.34985	0.148224	1.2457			Haiir follicle 2	1	7.98851	14.6322	1.87548	7.68103	1.29885	5.74601		Haiir follicle 2	0.174034	1.39027	2.5465	0.326397	1.33676	0.226044
														Haiir follicle 3	1	1.51779	0.868679	0.721338	0.589682	0.736359	0.905641		Haiir follicle 3	1.10419	1.67593	0.959187	0.796495	0.651121	0.81308			Haiir follicle 3	1	11.9161	28.7219	15.5245	12.8601	1.46853	11.9152		Haiir follicle 3	0.0839265	1.00008	2.41053	1.30291	1.07931	0.123249
														Haiir follicle 4	1	1.20261	1.24001	0.937029	1.05413	1.41925	1.14217		Haiir follicle 4	0.875525	1.05291	1.08566	0.820392	0.922914	1.24259			Haiir follicle 4	1	0.522779	1.00319	0.723007	0.522096	0.676538	0.741268		Haiir follicle 4	1.34904	0.70525	1.35334	0.975365	0.704328	0.912676
														Haiir follicle 5	1	1.36218	1.59454	0.428924	0.952791	1.5226	1.14351		Haiir follicle 5	0.874503	1.19123	1.39443	0.375095	0.833219	1.33152			Haiir follicle 5	1	0.225028	0.106996	1.15175	0.229517	0.0601852	0.462246		Haiir follicle 5	2.16335	0.486815	0.23147	2.49164	0.496527	0.130202
														Haiir follicle 6	1	0.431111	0.462222	0.306667	0.915556	1.52	0.772593		Haiir follicle 6	1.29434	0.558006	0.598274	0.396932	1.18504	1.9674			Haiir follicle 6	1	2.23438	2.89773	0.66375	2.07273	0.196875	1.51091		Haiir follicle 6	0.661853	1.47883	1.91787	0.439305	1.37184	0.130302
														Haiir follicle 7	1	0.798246	0.214912	0.732456	0.324561	1.28195	0.725355		Haiir follicle 7	1.37864	1.10049	0.296286	1.00979	0.447452	1.76735			Haiir follicle 7	1	0.854608	1.13481	0.804005	1.08874	0.848123	0.955047		Haiir follicle 7	1.04707	0.894833	1.18823	0.841848	1.13998	0.888043
														Haiir follicle 8	1	1.30081	0.349593	0.174797	0.186992	1.54065	0.758808		Haiir follicle 8	1.31786	1.71429	0.460714	0.230357	0.246429	2.03036			Haiir follicle 8	1	1.39962	1.35845	0.843572	0.269958	0.719443	0.931841		Haiir follicle 8	1.07314	1.50199	1.45782	0.905274	0.289704	0.772066
														Haiir follicle 9	1	0.936508	0.404762	0.746032	0.769841	1.83333	0.948413		Haiir follicle 9	1.05439	0.987448	0.426778	0.786611	0.811715	1.93305			Haiir follicle 9	1	9.51282	9.78788	8.60859	1.09868	1.27273	5.21345		Haiir follicle 9	0.191812	1.82467	1.87743	1.65123	0.210739	0.244124
														Haiir follicle 10	1	0.846809	0.174468	0.26383	0.417021	1.6383	0.723404		Haiir follicle 10	1.38235	1.17059	0.241176	0.364706	0.576471	2.26471			Haiir follicle 10	1	0.772094	1.95206	1.89886	0.288103	0.122544	1.00561		Haiir follicle 10	0.994421	0.767786	1.94117	1.88827	0.286496	0.12186
														bIII-tubulin									bIII-tubulin									bIII-tubulin									bIII-tubulin
															0-60	60-120	120-180	180-240	240-300	300-360	average			0-60	60-120	120-180	180-240	240-300	300-360				0-60	60-120	120-180	180-240	240-300	300-360	average			0-60	60-120	120-180	180-240	240-300	300-360
														Haiir follicle 1	1	0.791915	0.676298	0.0566439	0.141871	0.427983	0.515785		Haiir follicle 1	1.93879	1.53536	1.3112	0.109821	0.275057	0.829771			Haiir follicle 1	1	0.338912	1.7702	1.6495	0.302543	0.551979	0.935522		Haiir follicle 1	1.06892	0.362271	1.8922	1.76319	0.323394	0.590023
														Haiir follicle 2	1	0.554152	0.459347	0.213584	0.171493	0.786294	0.530812		Haiir follicle 2	1.88391	1.04397	0.865368	0.402373	0.323077	1.4813			Haiir follicle 2	1	17.6316	18.4737	1.25439	8.12939	2	8.08151		Haiir follicle 2	0.123739	2.18172	2.28592	0.155217	1.00592	0.247479
														Haiir follicle 3	1	1.08989	0.728396	0.681674	0.300639	0.701825	0.750404		Haiir follicle 3	1.33262	1.4524	0.970672	0.908409	0.400637	0.935263			Haiir follicle 3	1	3.00665	13.6548	4.70953	2.50111	0.718404	4.26508		Haiir follicle 3	0.234462	0.704946	3.20153	1.10421	0.586415	0.168438
														Haiir follicle 4	1	0.65871	0.511489	0.230208	0.526648	1.03463	0.660281		Haiir follicle 4	1.51451	0.997621	0.774654	0.348651	0.797612	1.56695			Haiir follicle 4	1	0.906314	0.953157	0.997149	1.26354	0.446584	0.927791		Haiir follicle 4	1.07783	0.976851	1.02734	1.07476	1.36188	0.481341
														Haiir follicle 5	1	1.01763	0.974385	0.203379	0.891955	1.59147	0.94647		Haiir follicle 5	1.05656	1.07518	1.02949	0.214881	0.942402	1.68148			Haiir follicle 5	1	0.368396	1.33246	0.827225	0.868158	0.120419	0.752776		Haiir follicle 5	1.32842	0.489383	1.77006	1.0989	1.15327	0.159966
														Haiir follicle 6	1	0.490446	0.248408	0.152866	0.522293	1.31574	0.621626		Haiir follicle 6	1.60869	0.788973	0.39961	0.245914	0.840205	2.11661			Haiir follicle 6	1	4.73869	3.15761	1.95377	3.08086	0.638191	2.42819		Haiir follicle 6	0.41183	1.95154	1.3004	0.804621	1.26879	0.262826
														Haiir follicle 7	1	0.561181	0.182138	0.255977	0.0393812	1.20253	0.540202		Haiir follicle 7	1.85116	1.03884	0.337166	0.473856	0.0729008	2.22608			Haiir follicle 7	1	0.425665	1.06808	1.09108	0.561815	0.527876	0.779085		Haiir follicle 7	1.28356	0.546365	1.37094	1.40046	0.721122	0.677558
														Haiir follicle 8	1	1.00588	0.335294	0.0882353	0.223529	1.20588	0.643137		Haiir follicle 8	1.55488	1.56402	0.521341	0.137195	0.347561	1.875			Haiir follicle 8	1	1.20127	1.2771	0.592928	0.338073	0.737987	0.857893		Haiir follicle 8	1.16565	1.40025	1.48865	0.691145	0.394074	0.860232
														Haiir follicle 9	1	0.494012	0.110778	0.0688623	0.143713	0.95509	0.462076		Haiir follicle 9	2.16415	1.06911	0.239741	0.149028	0.311015	2.06695			Haiir follicle 9	1	1.68269	2.19196	4.11458	0.576923	0.767857	1.72234		Haiir follicle 9	0.580607	0.976982	1.27267	2.38895	0.334965	0.445823
														Haiir follicle 10	1	0.654545	0.0861244	0.155024	0.241148	1.49282	0.604944		Haiir follicle 10	1.65305	1.08199	0.142368	0.256262	0.398629	2.4677			Haiir follicle 10	1	1.69031	0.489127	0.545692	0.752157	0.314161	0.798575		Haiir follicle 10	1.25223	2.11666	0.612499	0.683332	0.941873	0.393402
																							0							Highest											0							Highest
																								Signal intensity (A.U.)																		Signal intensity (A.U.)
														Raw data									Raw data/average
														P49 telogen									P49 telogen
														EGFL6	0-60	60-120	120-180	180-240	240-300	300-360	average		EGFL6	0-60	60-120	120-180	180-240	240-300	300-360
														Haiir follicle 1	1	1.00307	0.729294	0.866564	0.756902	0.590491	0.824386		Haiir follicle 1	1.21302	1.21674	0.884651	1.05116	0.91814	0.716279
														Haiir follicle 2	1	1.01722	1.04248	0.546498	0.921929	0.783008	0.88519		Haiir follicle 2	1.1297	1.14916	1.17769	0.61738	1.0415	0.884565
														Haiir follicle 3	1	1.52593	2.23704	0.62963	2.43704	2.27407	1.68395		Haiir follicle 3	0.593842	0.906158	1.32845	0.3739	1.44721	1.35044
														Haiir follicle 4	1	0.356707	0.407012	0.978659	1.06098	1.62602	0.904895		Haiir follicle 4	1.1051	0.394197	0.449789	1.08152	1.17249	1.79691
														Haiir follicle 5	1	1.0252	0.979839	1.35181	0.762097	3.62903	1.458		Haiir follicle 5	0.685872	0.703158	0.672044	0.927172	0.522701	2.48905
														Haiir follicle 6	1	1.11374	0.401274	2.34315	1.36146	1	1.20327		Haiir follicle 6	0.831067	0.925593	0.333486	1.94732	1.13147	0.831067
														Haiir follicle 7	1	1.72841	0.347727	1.54943	2.60284	2.05568	1.54735		Haiir follicle 7	0.646267	1.11701	0.224725	1.00135	1.68213	1.32852
														Haiir follicle 8	1	1.55692	1.55769	0.218462	0.958846	1.32308	1.1025		Haiir follicle 8	0.90703	1.41218	1.41287	0.198151	0.869702	1.20007
														Haiir follicle 9	1	0.588235	0.0705882	0.253922	0.441177	0.776471	0.521732		Haiir follicle 9	1.91669	1.12747	0.135296	0.48669	0.8456	1.48826
														Haiir follicle 10	1	0.915622	0.681704	0.835422	1.08939	1.49123	1.00223		Haiir follicle 10	0.997777	0.913587	0.680189	0.833565	1.08697	1.48791
														Nestin									Nestin
															0-60	60-120	120-180	180-240	240-300	300-360	average			0-60	60-120	120-180	180-240	240-300	300-360
														Haiir follicle 1	1	1.32494	1.25779	1.91847	1.13909	0.77458	1.23581		Haiir follicle 1	0.809185	1.07212	1.01779	1.55239	0.921734	0.626779
														Haiir follicle 2	1	0.852113	0.32495	0.151912	0.775654	0.687123	0.631958		Haiir follicle 2	1.58238	1.34837	0.514195	0.240382	1.22738	1.08729
														Haiir follicle 3	1	1.55674	1.81818	0.784314	1.69341	1.51515	1.39463		Haiir follicle 3	0.717035	1.11624	1.3037	0.56238	1.21423	1.08642
														Haiir follicle 4	1	0.643538	1.1679	1.65413	1.32521	1.37712	1.19465		Haiir follicle 4	0.837065	0.538683	0.977611	1.38461	1.10929	1.15274
														Haiir follicle 5	1	1.00658	0.621711	2.04276	0.865954	1.79852	1.22259		Haiir follicle 5	0.817937	0.823318	0.50852	1.67085	0.708296	1.47108
														Haiir follicle 6	1	0.691429	0.205	2	1.39	1.87111	1.19292		Haiir follicle 6	0.838277	0.579609	0.171847	1.67655	1.1652	1.56851
														Haiir follicle 7	1	1.93478	0.619565	2.13043	2.11413	2.125	1.65399		Haiir follicle 7	0.6046	1.16977	0.374589	1.28806	1.2782	1.28478
														Haiir follicle 8	1	1.66502	2.74877	0.438424	1.03633	1.20197	1.34842		Haiir follicle 8	0.741609	1.2348	2.03851	0.325139	0.768552	0.891392
														Haiir follicle 9	1	1.59722	0.152778	2.13889	0.930556	1.16667	1.16435		Haiir follicle 9	0.858847	1.37177	0.131213	1.83698	0.799205	1.00199
														Haiir follicle 10	1	1.38724	2.63792	1.92633	1.60288	2.41509	1.82824		Haiir follicle 10	0.546974	0.758785	1.44287	1.05365	0.87673	1.32099
														bIII-tubulin									bIII-tubulin
															0-60	60-120	120-180	180-240	240-300	300-360	average			0-60	60-120	120-180	180-240	240-300	300-360
														Haiir follicle 1	1	1.73851	1.79598	1.43391	0.982759	1.28161	1.37213		Haiir follicle 1	0.728796	1.26702	1.3089	1.04503	0.71623	0.934031
														Haiir follicle 2	1	0.810244	0.237485	0.314319	0.526193	0.378347	0.544432		Haiir follicle 2	1.83678	1.48824	0.436208	0.577334	0.9665	0.694939
														Haiir follicle 3	1	1.18518	0.796296	1.2037	1.74074	1.77778	1.28395		Haiir follicle 3	0.778846	0.923077	0.620192	0.9375	1.35577	1.38462
														Haiir follicle 4	1	0.488688	0.901018	0.447964	0.590498	0.972851	0.733503		Haiir follicle 4	1.36332	0.666238	1.22838	0.610718	0.805038	1.32631
														Haiir follicle 5	1	2.67188	1.15057	3.1321	0.84375	3.02983	1.97135		Haiir follicle 5	0.507266	1.35535	0.583643	1.58881	0.428005	1.53693
														Haiir follicle 6	1	0.761646	0.0703125	0.89572	0.146739	0.991848	0.644378		Haiir follicle 6	1.55189	1.18199	0.109117	1.39005	0.227722	1.53923
														Haiir follicle 7	1	1.25698	1.40782	1.96718	1.90433	1.7095	1.54097		Haiir follicle 7	0.648943	0.81571	0.913595	1.27659	1.2358	1.10937
														Haiir follicle 8	1	2.30534	1.52004	0.290076	1.06489	2.0229	1.36721		Haiir follicle 8	0.731418	1.68617	1.11178	0.212167	0.778876	1.47959
														Haiir follicle 9	1	1.19231	0.525641	1.34615	0.557692	0.929487	0.925214		Haiir follicle 9	1.08083	1.28868	0.568129	1.45497	0.602771	1.00462
														Haiir follicle 10	1	0.380952	1.35979	0.677249	1.59788	1.36111	1.06283		Haiir follicle 10	0.940884	0.358432	1.2794	0.637212	1.50342	1.28065
																							0							Highest
																								Signal intensity (A.U.)
