# Supplementary material for: Hair follicle epidermal stem cells define a niche for tactile sensation
Source: eLife. 2018 Oct 25;7:e38883. doi: 10.7554/eLife.38883 (PMC6226291; doi:10.7554/eLife.38883)
Supplement: Table 1–source data 1. [file elife-38883-table1-data1.xlsx]

## Sheet: Sheet1
Table1–source data 1: Raw numerical data for Table 1
	Table 1. Statistics source data
	Mouse	Fiber	Geno-	Activation	Conduction velocity	Spontaneous activity	RF size
	ID	ID	type	Th. (V)	(m/s)	(imp/s)	(mm2)
	31147	Eg007	WT	7	9.2	0	13.3333
	31147	Eg008	WT	2.6	8	0	4.7343
	31147	Eg009	WT	3.1	6.28571	0	6.23188
	31147	Eg010	WT	3.2	5.14286	0	10.9179
	31147	Eg011	WT	3.3	7.69231	0	19.4203
	31147	Eg012	WT	4.6	6.77419	0	4.54106
	31147	Eg013	WT	2.8	8.46154	0	13.285
	31149	Eg025	WT	3	5.66667	0	5.89372
	31149	Eg026	WT	4	3.91892	0	13.3333
	31149	Eg027	WT	3	6.19048	0	15.7005
	31149	Eg028	WT	1	5.58824	0	8.59903
	31149	Eg029	WT	1.4	7.30769	0	4.83092
	31149	Eg031	WT	1.4	7.30769	0	4.83092
	31149	Eg032	WT	2	7.10526	0	6.18357
	31149	Eg034	WT	2.6	6.85714	0	4.7343
	31150	Eg035	WT	5	4	0	8.64734
	31150	Eg036	WT	4	6.57143	0	8.59903
	31150	Eg038	WT	2	7.75	0	2.02899
	31150	Eg039	WT	12	1.82609	0	3.1401
	31150	Eg040	WT	7	8.22222	0	6.47343
	31150	Eg042	WT	2	5.26316	0	10.5314
	31150	Eg043	WT	3	3.4	0	8.74396
	31150	Eg044	WT	4	3.86364	0	13.3816
			Median	3	6.57143	0	8.59903
			IQR (25%)	2	5.14286	0	4.83092
			IQR (75%)	4	7.69231	0	13.285
	Mouse	Fiber	Geno-	Activation	Conduction velocity	Spontaneous activity	RF size
	ID	ID	type	Th. (V)	(m/s)	(imp/s)	(mm2)
	31148	Eg015	Egfl6 -/Y	3	6.33333	0	7.343
	31148	Eg016	Egfl6 -/Y	4	7.33333	0	3.1401
	31148	Eg019	Egfl6 -/Y	2	4.5	0	8.64734
	31148	Eg020	Egfl6 -/Y	6	9.16667	0	6.03865
	31148	Eg021	Egfl6 -/Y	6	9.64286	0	4.83092
	31148	Eg022	Egfl6 -/Y	5	8.09524	0	4.83092
	31148	Eg023	Egfl6 -/Y	2	5	0	13.0918
	31148	Eg024	Egfl6 -/Y	2	7.27273	0	6.47343
	31153	Eg046	Egfl6 -/Y	2	4.70588	0	2.70531
	31153	Eg047	Egfl6 -/Y	8	9	0	3.42995
	31153	Eg049	Egfl6 -/Y	3	7.71429	0	7.29469
	31153	Eg051	Egfl6 -/Y	9	4.53125	0	13.0918
	31153	Eg052	Egfl6 -/Y	3	9.64286	0	2.17391
	31153	Eg053	Egfl6 -/Y	15	1.56863	0	2.89855
	31153	Eg054	Egfl6 -/Y	9	3.75	0	8.64734
	31154	Eg055	Egfl6 -/Y	2	6.4	0	6.47343
	31154	Eg056	Egfl6 -/Y	2	8.05556	0	3.42995
	31154	Eg057	Egfl6 -/Y	7	8.57143	0	1.93237
	31154	Eg058	Egfl6 -/Y	0.6	8.46154	0	2.07729
	31154	Eg059	Egfl6 -/Y	3	8.57143	0	8.55072
	31154	Eg060	Egfl6 -/Y	0.7	9.28571	0	7.00483
	31154	Eg061	Egfl6 -/Y	2	8.06452	0	10.5314
	31154	Eg062	Egfl6 -/Y	3	5.95238	0	9.13043
	31154	Eg064	Egfl6 -/Y	5	6.15385	0	3.42995
			Median	3	7.52381	0	6.25604
			IQR (25%)	2	5.2381	0	3.21256
			IQR (75%)	6	8.57143	0	8.62319
